27 **SUMMARY**

28 The virome is one of the most variable components of the human gut microbiome.  
29 Within twin-pairs, viromes have been shown to be similar for infants but not for  
30 adults, indicating that as twins age and their environments and microbiomes diverge,  
31 so do their viromes. The degree to which the microbiome drives the virome's vast  
32 diversity is unclear. Here, we examined the relationship between microbiome  
33 diversity and virome diversity in 21 adult monozygotic twin pairs selected for high or  
34 low microbiome concordance. Viromes derived from virus-like particles were unique  
35 to each subject, dominated by Caudovirales and Microviridae, and exhibited a small  
36 core that included crAssphage. Microbiome-discordant twins had more dissimilar  
37 viromes compared to microbiome-concordant twins, and the richer the microbiomes,  
38 the richer the viromes. These patterns were driven by the bacteriophages, not  
39 eukaryotic viruses. These observations support a strong role of the microbiome in  
40 patterning the virome.

## 41 INTRODUCTION

42           The bulk of the human gut microbiome is composed of a vast diversity of  
43 bacterial cells, along with a minority of archaeal and eukaryotic cells. The cellular  
44 fraction of the microbiome forms a high density microbial ecosystem ( $10^{11}$  -  $10^{12}$  per  
45 gram of feces (Sender et al., 2016). All of these cells are accompanied by a virome  
46 estimated to be in about equal proportion (ranging between  $10^9$  to  $10^{12}$  per gram of  
47 feces (Castro-Mejía et al., 2015; Hoyles et al., 2014; Ogilvie and Jones, 2017; Reyes  
48 et al., 2010). The viral fraction of the human gut microbiome is primarily composed of  
49 bacteriophages and prophages, and it also includes rarer eukaryotic viruses and  
50 endogenous retroviruses (Breitbart et al., 2003; Minot et al., 2011; Reyes et al.,  
51 2010). Currently, the majority of phages have no matches in databases and their  
52 hosts remain to be elucidated. Matching phages to their hosts is challenging: for  
53 instance, the host of the most common human gut phage, crAssphage, has only  
54 recently been identified as *Bacteroides spp.* (Shkoporov et al., 2018; Yutin et al.,  
55 2018). In addition to the identification of hosts, other questions remain as to the  
56 factors most important in shaping the virome, and how predictive the cellular fraction  
57 of the microbiome can be of the virome.

58           The temporal population dynamics of phages and their hosts might be  
59 expected to be linked. Indeed, population oscillations of viruses and their bacterial  
60 hosts are described for aquatic systems, where they indicate that viruses play a key  
61 role in regulating bacterial populations (Suttle, 2007; Thingstad, 2000; Thingstad et  
62 al., 2014; Weitz and Dushoff, 2008). But such patterns of predator/prey dynamics are  
63 not typical for the human gut virome and microbiome (for clarity, from here on we  
64 use 'microbiome' to refer to cellular fraction of the microbiome, e.g., mostly bacterial

65 cells) (Minot et al., 2011; Reyes et al., 2013; Rodriguez-Brito et al., 2010; Rodriguez-  
66 Valera et al., 2009). Nonetheless, the virome and microbiome do display some  
67 common patterns of diversity across hosts, such as high levels of interpersonal  
68 differences and relative stability over time (Reyes et al., 2010). The microbiome  
69 tends to be more similar for related individuals compared to unrelated individuals,  
70 possibly due to shared dietary habits, which drive similarity between microbiomes  
71 (Cotillard et al., 2013; David et al., 2014). In accord, diet has been associated with  
72 virome diversity, quite possibly through diet effects on the microbiome (Minot et al.,  
73 2011). In infants, twin comparisons have revealed viromes to be more similar  
74 between co-twins than between unrelated individuals (Lim et al., 2015; Reyes et al.,  
75 2015). This pattern was not observed in adult twins (Reyes et al., 2010) possibly due  
76 to divergence of their microbiomes (Reyes et al., 2010). The degree to which the  
77 microbiome itself drives patterns of virome diversity across hosts has been difficult to  
78 assess due to confounding factors such as host relatedness.

79         Here, we focus on adult monozygotic (MZ) twin microbiomes to explore  
80 further the relationship between microbiome and virome diversity. By studying the  
81 viromes of MZ twin pairs, we control for host genetic relatedness. Although MZ twin  
82 pairs generally have more similar microbiomes compared to dizygotic (DZ) twin pairs  
83 or unrelated individuals, MZ twins nevertheless can display a large range of within-  
84 twin-pair microbiome diversity (Goodrich et al., 2014). We previously generated fecal  
85 microbiome data for twin pairs from the TwinsUK cohort (Goodrich et al., 2014), and  
86 based on this information we selected twin pairs either highly concordant or highly  
87 discordant for their microbiomes. We generated viromes from virus-like particles  
88 (VLPs) obtained from the same samples from which the microbiomes were derived.

89 Results indicate that microbiome diversity and virome diversity measures are  
90 positively associated.

91

## 92 **RESULTS**

93 **Selection of microbiome-concordant and discordant monozygotic twin**  
94 **pairs** - We selected twin pairs with a similar body mass index (BMI), whose  
95 microbiomes were either concordant or discordant for microbiome between-sample  
96 diversity ( $\beta$ -diversity) based on previously obtained 16S rRNA gene data. The adult  
97 co-twins in this study did not share a household and we assume that other  
98 environmental variability was similar across twin pairs. We determined the degree of  
99 concordance or discordance between co-twins' microbiomes based on three  $\beta$ -  
100 diversity distance metrics: Bray-Curtis, weighted UniFrac and unweighted UniFrac  
101 **(See Methods)**. As expected, the  $\beta$ -diversity measures were correlated (Pearson  
102 pairwise correlation coefficient  $> 0.4$ ). Based on the distribution of pairwise distance  
103 measures, we selected 21 MZ twin pairs from the boundaries of all three distributions  
104 **(Figure 1A)**, while maintaining a balanced distribution of age and BMI across the set  
105 **(Table S1)**. Within the 21 selected twin pairs, the microbiomes of microbiome-  
106 concordant co-twins were, as expected, more similar to each other than microbiomes  
107 of microbiome-discordant co-twins ( $p = 6.31 \times 10^{-12}$ ). The microbiomes of the  
108 discordant co-twins differed compositionally at all taxonomic levels, particularly at the  
109 phylum level, with Firmicutes and Bacteroidetes, the two dominant phyla,  
110 contributing the most to the variation between co-twins **(Figure 1B and 1C)**.

111 **Shotgun metagenomes of VLPs** - We isolated virus-like particles (VLPs)  
112 from the same fecal samples that had been used for 16S rRNA gene diversity

113 profiling (**See Methods**). DNA extracted from VLPs was used in whole genome  
114 amplification followed by shotgun metagenome sequencing (**See Methods**). A first  
115 library (“large-insert-size library”) was selected with an average insert size of 500 bp  
116 (34,325,116 paired reads in total;  $817,265 \pm 249,550$  paired reads per sample after  
117 quality control) and used for *de novo* assembly of viral contigs. Smaller fragments  
118 with an average insert size of 300bp were purified in a second library (“small-insert-  
119 size library”) and sequenced. The resulting pair-end reads were merged into  
120 25,324,163 quality filtered longer reads to increase mapping accuracy ( $602,956 \pm$   
121  $595,444$  merged reads per sample) (**See Methods**) (**Table S2**).

122 **Identification of putative bacterial contaminants** - Viromes prepared and  
123 sequenced from VLPs may be contaminated with bacterial DNA (Roux et al., 2013).  
124 However, given that phages are major agents of horizontal gene transfer and that  
125 temperate viruses often comprise up to 10% of bacterial genomes in a prophage  
126 state, removal of potential bacterial contamination risks also removing viral reads. To  
127 assess bacterial DNA contamination, we mapped virome reads against a set of  
128 8,163 fully assembled bacterial genomes. Our strategy consisted of evaluating the  
129 coverage along the length of each genome (in bins of 100Kb), and those genomes  
130 with a median coverage greater than 100 were considered contaminants. Reads  
131 mapping to short regions were considered to be prophages or horizontally  
132 transferred genes and retained (**See Methods**) (**Figure 2A**). Reads mapping to  
133 genomes determined to be potential contaminants were removed from further  
134 analyses.

135 We identified 65 bacterial genomes as contributing to potential contaminant,  
136 with  $1.006 \pm 1.125\%$  (average  $\pm$  std) reads per sample mapping to those bacterial

137 genomes (**Table S2**). The majority (37/68) belonged to the Firmicutes phylum; at the  
138 species level, *Bacteroides dorei*, *B. vulgatus*, *Ruminococcus bromii*,  
139 *Faecalibacterium prausnitzii*, *B. xylanisolvens*, *Odoribacter splanchnicus* and *B.*  
140 *caecimuris* (in that order) were detectable in at least 50% of the samples (**Table S2**).  
141 If the most abundant bacterial species in the microbiome are the most likely sources  
142 of contamination, then the taxonomic composition of the bacterial contaminants  
143 should correlate with their corresponding bacterial abundances in the microbiome.  
144 However, we observed no significant correlation between the relative abundances of  
145 taxa represented in the contaminant DNA and in the microbiomes (**Figure 2B**).

146 **Functional profiles support viral enrichment in VLP purifications** - To  
147 assess the functional content of the viromes, we annotated the “short-insert-size  
148 library” raw reads using the KEGG annotation of the Integrated Gene Catalog (IGC)  
149 (Li et al., 2014) (**See Methods**). In line with previous reports (Breitbart et al., 2008;  
150 Minot et al., 2011; Reyes et al., 2010), the majority of reads ( $85.43 \pm 5.74\%$ ) from  
151 our VLP metagenomes mapped to genes with unknown function (**Figure 3A**).

152 To further verify that sequences were derived from VLPs and not microbiomes  
153 generally, we conducted an internal check in which we generated and compared  
154 additional metagenomes from VLPs and bulk fecal DNA for an additional 4  
155 individuals (2 twin pairs; **Figure 1A**). As expected, the functional profiles of viromes  
156 and microbiome-metagenomes derived from the same samples were dissimilar.  
157 Virome reads that mapped to annotated genes were enriched in two categories:  
158 Genetic Information Process ( $48.87 \pm 12.12\%$ ) and Nucleotide Metabolism ( $17.59 \pm$   
159  $8.81\%$ ), compared to  $24.31 \pm 1.28\%$  and  $5.47 \pm 0.4\%$  for the microbiome-  
160 metagenome, respectively (**Figure 3B**). Most of the other functional categories

161 present in the bacterial metagenomes were essentially absent from the viromes.  
162 Furthermore, the functional annotations of the viromes show greater between-  
163 sample variability than the microbiomes and a lower intraclass correlation coefficient  
164 (**Figure 3B**).

165 **Viromes are unique to individuals** - We assembled reads from the “large-  
166 insert-size library” resulting in a total of 107,307 contigs  $\geq$  500 nt (max: 79,863 nt;  
167 mean 1,186nt  $\pm$  1,741; **Figure S1**). To assess the structure and composition of the  
168 viromes, a matrix of the recruitment of reads against dereplicated contigs were built  
169 (**See Methods**). The recruitment matrix included 14,584 contigs that were both long  
170 ( $>$  1,300 nt) and well covered ( $>$  5X); these are referred to as ‘virotypes’ (**Figure S1**).  
171 Analysis of the recruitment matrix showed that each individual harbored a unique set  
172 of virotypes: 3,415 virotypes (23.41% of total) were present in only one individual;  
173 413 virotypes (2.83%) were present in at least 50% of the individuals; only 18  
174 virotypes (0.1%) were present in all individuals.

175 **Twins with concordant microbiomes share virotypes** - We checked for  
176 virotypes shared between twins and observed that co-twins did not share more  
177 virotypes than unrelated individuals ( $p = 0.074$ ). We then assessed microbiome-  
178 concordant and discordant twin pairs separately: twins with a discordant microbiome  
179 did not share more virotypes than unrelated individuals ( $p = 0.254$ ), and twins with a  
180 concordant microbiome did share more virotypes than unrelated individuals ( $p =$   
181 0.048). Furthermore, we also found that twins with a concordant microbiome shared  
182 more virotypes than twins with a discordant microbiome ( $p = 0.015$ ; **Figure S2**).



183           **Bacteriophage dominance of the gut virome** - In order to characterize the  
184 taxonomic composition of the virome, we attempt to annotated all 66,446  
185 dereplicated and well covered contigs (**Figure S1**) using a voting system approach  
186 that exploited the information in both the assembled contigs and their encoding  
187 proteins (**See Methods**). In addition, we performed a custom annotation on two  
188 highly abundant gut-associated bacteriophage families: (i) the crAssphage (Dutilh et  
189 al. 2014; Yuting et al. 2018) and (ii) the *Microviridae* families (Székely and Breitbart  
190 2016). For this, we used profile Hidden Markov Models (HMMs) to search for  
191 crAssphage (dsDNA viruses) and *Microviridae* (ssDNA viruses) contigs (**See**  
192 **Methods**).

193           Using HMMs allowed us to identify distant homologs, which we then  
194 incorporated into a phylogenetic tree with known reference sequences to confirm the  
195 annotation and better resolve the taxonomy. We annotated 108 contigs (19  
196 crAssphage, 90 *Microviridae*), validated the family assignment of 68 contigs, and  
197 assigned a subfamily to 97 contigs without previous subfamily assignment. For the  
198 *Microviridae*, only 11 contigs had a previous taxonomic assignment, all belonging to  
199 the *Gokushovirinae*: we confirmed these and 23 more as *Gokushovirinae*, 54 as  
200 *Alpavirinae* and 1 contig as *Pichovirinae* (**Figure S3A**). For the crAssphage, 11  
201 contigs were clustered with the original crAssphage, 3 contigs grouped with the  
202 reference Chlamydia phage, and 5 contig grouped with the reference IAS virus  
203 (**Figure S3B**).

204           After collating the voting system annotation and the HMM annotation, a total  
205 of 12,751 contigs (29,62%) were taxonomically assigned (**Figure S1**). Viromes were  
206 dominated by bacteriophages with only 6.42% of contigs annotated as Eukaryotic

207 viruses. As expected, most of the contigs (96.98%) were dsDNA viruses, while only  
208 2.43% of contigs were annotated as ssDNA viruses. Caudovirales was the most  
209 abundant Order, with its three main families represented: Myoviridae (20.22 ±  
210 4.83%), *Podoviridae* (10.54 ± 3.27%), and *Siphoviridae* (35.25 ± 7.19%). The  
211 crAssphage family constituted on average 13.26% (± 12.24%) of the contigs,  
212 reaching a maximum contribution of 55.80% in one virome, and *Microviridae*  
213 represented 3.87 ± 2.57% of the viromes. Interestingly, we observed that  
214 *Phycodnaviridae* exceeded 1% of average abundance (1.77 ± 1.12%; **Figure 4A**)  
215 and that contigs related to any nucleocytoplasmic large DNA viruses (NCLDV) had a  
216 mean relative contribution of 3.99 ± 2.22%. The 18 contigs present in all samples  
217 included 10 annotated as crAssphage, 2 annotated as “unclassified Myoviridae”, 2  
218 “unclassified Caudovirales”, 1 classified as *Microviridae*, and 3 unclassified. Within a  
219 defined taxonomic profile for each sample, we looked for differences in composition  
220 between viromes at all taxonomic levels for concordant and discordant twin-pairs.  
221 There were no significant differences between groups for any taxa at the Order and  
222 Family levels, including crAssphage and *Microviridae* families (**Figure 4B**).

223 We used CRISPR spacer mapping and the microbe-versus-phage (MVP)  
224 database (Gao et al., 2018) to predict hosts for virotypes and taxonomically  
225 characterized contigs (**See Methods**). As host annotation was directed to  
226 bacteriophages, we did not gain any information for contigs annotated as Eukaryotic  
227 viruses. These approaches allowed us to identify putative hosts for 910 contigs.  
228 Within these 910 contigs, only one was previously annotated as crAssphage, and as  
229 expected, its host was inferred to be a member of *Bacteroidetes*. In total we  
230 identified 1,280 bacterial putative host strains, including 187 species from 87 genera  
231 over several phyla; most of them from Firmicutes (92), followed by Bacteroidetes

232 (41) and Proteobacteria (38). The median number of host for each contig was 1  
233 (IQR=1-2) while the median number of phages per host, at the strain level, was 2  
234 (IQR=1-3) (Figure S4).

235 **Virome diversity correlates with microbiome diversity** - To assess the  
236 relationship between virome and microbiome diversity, we examined the within-  
237 samples diversity ( $\alpha$ -diversity) and  $\beta$ -diversity of the viromes using three different  
238 layers of information that we recovered from the sequence data: i) virotypes, iii)  
239 taxonomically annotated contigs, and iii) annotated genes from short reads (**Figure**  
240 **S1**).

241 **Alpha-diversity** -  $\alpha$ -diversities of the microbiome and the virome were  
242 positively correlated in two of the three layers of information used to test the  
243 correlation (virotypes and taxonomy annotated contigs but not genes; **Figure 5A**).  
244 We used annotated contigs to ask about the  $\alpha$ -diversity within subgroups of viruses:  
245 (ssDNA eukaryotic, dsDNA eukaryotic, ssDNA bacteria and dsDNA bacteria). Our  
246 results show that the diversity of eukaryotic viruses does not correlate with the  
247 microbiome  $\alpha$ -diversity. In contrast, bacteriophages and microbiome  $\alpha$ -diversity were  
248 positively correlated, for both ssDNA or dsDNA bacterial viruses (**Figure 5B**).

249 **Beta-diversity** - We observed that concordant twins had lower virome  $\beta$ -  
250 diversity compared to discordant twins using Hellinger distances (**Figure 6**); the  
251 mean binary Jaccard distance and Bray-Curtis dissimilarity of viromes also showed  
252 the same trend (**Figure S5A and S5B**). Similar to what we observed with  $\alpha$ -diversity,  
253 regardless of the layer of information used, the mean Hellinger distance of viromes  
254 within MZ twin pairs with concordant microbiomes was significantly lower than that of  
255 MZ twin pairs with discordant microbiomes ( $p < 0.04$ , Mann-Whitney's U test)

256 **(Figure 6)**. Furthermore, a similar significant positive correlation was observed  
257 between microbiome and virome  $\beta$ -diversity when using the annotated contigs. This  
258 relationship was driven by the bacteriophages ( $p = 0.009$ , Mann-Whitney's U test),  
259 but not the eukaryotic viruses ( $p = 0.243$ , Mann-Whitney's U test).

260 Finally, we compared the virome and microbiome pairwise distances among  
261 related (co-twins) and unrelated individuals. The pairwise distance matrices showed  
262 a positive correlation between virome and microbiome  $\beta$ -diversity measures not only  
263 within twin pairs (Pearson correlation coefficient  $> 0.50$ ) but also generally across all  
264 individuals (Pearson correlation coefficient  $> 0.25$ ;  $p < 0.003$ , Mantel test; **Figure**  
265 **S5C**). These results show that regardless of genetic relatedness between hosts,  
266 individuals with more similar microbiomes harbour more similar viromes.

267

## 268 **DISCUSSION**

269 Co-twins, like other siblings, generally have more similar gut microbiomes  
270 within their twinships compared to unrelated individuals (Lee et al., 2011; Palmer et  
271 al., 2007; Tims et al., 2013; Turnbaugh et al., 2009; Yatsunenکو et al., 2012).  
272 Moreover, MZ twins have overall more similar microbiomes than DZ twins, although  
273 at a whole-microbiome level this effect is small and primarily driven by a small set of  
274 heritable microbiota (Goodrich et al., 2014, 2016). Within a population of MZ twin  
275 pairs, however, the range of within-twin pair differences in the microbiomes can be  
276 as great as for DZ twins (Goodrich et al., 2014). We took advantage of the large  
277 spread in  $\beta$ -diversity for MZ co-twins to select co-twins that were either highly  
278 concordant or discordant for their gut microbiomes. Our analysis of their viromes  
279 showed that despite the high variation in the gut viromes between individuals, and

280 regardless of host relatedness, the more dissimilar their microbiomes, the more  
281 dissimilar their viromes. This pattern was driven by the bacteriophage component of  
282 the virome.

283 Here, by choosing MZ twins from a distribution of divergence in the  
284 microbiome, we removed host genetic relatedness as a variable. Previous studies of  
285 the viromes and microbiomes of infant twin pairs showed that the microbiomes and  
286 viromes of co-twins were more similar than those of unrelated individuals, suggested  
287 shared host genotype and/or environment were key (Lim et al., 2015; Reyes et al.,  
288 2015). In contrast, an early study of the virome of adult twins showed that adult co-  
289 twins did not have more similar viromes than unrelated individuals (Reyes et al.,  
290 2010); however, in light of the current study's results, this was likely a power issue.  
291 Indeed, in our dataset we observed that regardless of whether twins were  
292 concordant or discordant for their microbiomes, co-twins had more similar viromes  
293 (virotypes and taxonomy) than unrelated individuals.

294 The previously reported greater virome similarity in young compared to adult  
295 twins has been related to the fact that infants have a greater shared environment  
296 compared to adult twins (Lim et al., 2015), particularly in terms of their diet. Minot et  
297 al., have also shown that individuals on the same diet have more similar gut viromes  
298 than individuals on dissimilar diets (Minot et al., 2011). It is well established that diet  
299 is a strong driver of daily microbiome fluctuation (Claesson et al., 2012; David et al.,  
300 2014; De Filippo et al., 2010; Wu et al., 2011), so the effect of diet on the virome is  
301 likely mediated by the microbiome. However, we did not control for diet, so it is  
302 possible that the microbiome discordance that we observe was caused by co-twins  
303 eating differently around the time of sampling. Regardless of what underlies the

304 variance in microbiome concordance, it is strongly associated with virome  
305 concordance.

306 The relationship between virome richness and microbiome richness had not  
307 previously been directly addressed in adults. We observed that the  $\alpha$ -diversity of the  
308 microbiome and the virome were positively correlated using two of the three layers of  
309 information describing virome diversity. Specifically, this pattern was observed for  
310 virotypes and taxonomy but not for genes. However, since virome genes were  
311 observed to be enriched in only two categories, Genetic Information Processing and  
312 Nucleotide Metabolism, we would not expect differences in diversity of virome genes  
313 between subjects. The taxonomic annotation layer showed that the bacteriophage  
314 component of the virome, not the eukaryotic viruses, was driving this  $\alpha$ -diversity  
315 correlation pattern.

316 The positive relationship between virome and microbiome  $\alpha$ -diversity  
317 suggests that a greater availability of hosts drives a greater availability of viruses.  
318 These observations are in accordance with "(Minot et al., 2013; Reyes et al., 2010),  
319 which posits that in a (Minot et al., 2013; Reyes et al., 2010) (Knowles et al., 2016).  
320 Indeed, longitudinal studies of the human gut virome have reported genes  
321 associated with lysogeny, low mutation rate over time in temperate-like contigs, and  
322 long-term stability of the virome, suggesting preference for a lysogenic cycle (Minot  
323 et al., 2013; Reyes et al., 2010). Nevertheless, phage predation has been  
324 acknowledged as an important factor for the maintenance of highly diverse and  
325 efficient ecosystems (Rodriguez-Valera et al., 2009) and may play a role in the  
326 maintenance of diversity in a rapidly changing ecosystem as the human gut (David et  
327 al., 2014). Short scale time-series analyses of virome-microbiome interactions, along

328 with a better understanding of the lysogenic-lytic switch in viral reproduction, would  
329 help to interpret the observed patterns in the human gut virome.

330 The composition of the viromes described here was similar to what has been  
331 previously reported for adult fecal viromes (Minot et al., 2011, 2013; Reyes et al.,  
332 2010) but stands in contrast to what has been observed in babies (Lim et al., 2015).  
333 From the annotated fraction of the virome, the order *Caudovirales* and its families  
334 *Siphoviridae*, *Myoviridae*, and *Podoviridae*, along with crAssphage, were the  
335 dominant phages in all samples. Manrique *et al.* have summarized the phage  
336 colonization of the infant gut as follows: the eukaryotic viruses first dominate the  
337 newborn gut, followed by the *Caudovirales*, and by 2.5 years of age the *Microviridae*  
338 start to dominate (Manrique et al., 2017). We did observe abundant *Microviridae* in  
339 our sample set, but the *Caudovirales* were the dominant group. Age was not related  
340 to patterns of diversity in the set of adult subjects studied here.

341 Despite the high diversity and uniqueness of each virome described here, we  
342 nonetheless recovered a core virome among the subjects: 18 contigs were present  
343 in all samples. More than half of these contigs were annotated as crAssphage,  
344 consistent with recent reports that this phage is widespread (Dutilh et al., 2014;  
345 Manrique et al., 2016; Yarygin et al., 2017). Other shared virotypes in our dataset  
346 were classified as *Myoviridae* and *Microviridae*. We also recovered contigs mapping  
347 to representative families of the nucleocytoplasmic large DNA viruses (NCLDV),  
348 *Phycodnaviridae* and *Mimiviridae*. These types of viruses are increasingly reported  
349 as members of the human gut virome (Colson et al., 2013; Halary et al., 2016). A  
350 core set of bacteriophages consisting of nine representatives, including crAssphage,  
351 has previously been reported for the human gut (Manrique et al., 2016). Widely

352 shared virotypes may indicate the wide sharing of specific hosts between individuals,  
353 or that these viruses have a broad host range within the human microbiome.

354 Our use of the HMMs to annotate viral contigs allowed a deep exploration into  
355 the taxonomic content of the virome. We annotated a diversity of contigs beyond  
356 what was revealed from comparisons to public databases, and also confirmed those  
357 annotations. Because each type of virus (e.g., family) requires its own HMM, we  
358 applied this method to a few key groups. When applied to the crAssphage, the HMM  
359 retrieved contigs that grouped only with sequences derived from fecal viromes and  
360 not with sequences from other environments (e.g., terrestrial or marine). This  
361 suggests that although crAssphage is a diverse group of bacteriophages, its diversity  
362 in the human gut is restricted to sequences related to the reference crAssphage  
363 genome (Dutilh et al., 2014), the IAS virus reference (Shkoporov et al., 2018), or  
364 *Chlamydia* bacteriophage (Yutin et al., 2018). We also applied HMM to the family  
365 *Microviridae*, which are single strand DNA bacteriophages. We were able to confirm  
366 the presence of diverse members of *Gokushovirinae* and *Alpavirinae* subfamilies.  
367 Although there is evidence that described *Alpavirinae* genomes constitute a third  
368 group of the *Microviridae* family (Krupovic and Forterre 2011; Roux et al. 2012), they  
369 correspond to prophages, which makes it difficult to integrate them into the taxonomy  
370 of the International Committee on Taxonomy of Viruses (ICTV), thus, no contigs  
371 were annotated as *Alpavirinae* prior to application of the HMM profiles.

372 For each taxonomic group of viruses, there is a corresponding set of bacterial  
373 hosts. From the 16S rRNA gene diversity data we used to select the twin pairs, it is  
374 clear which bacteria phyla contribute the most to the differences in the microbiomes  
375 of concordant and discordant twins. But unlike for bacteria, we were not able to



376 discern such clear patterns by order or family in the virome. Indeed, most of the  
377 bacteriophage diversity is grouped in just one order, *Caudovirales*, and its three  
378 families *Myoviridae*, *Podoviridae* and *Siphoviridae*. Representatives of these families  
379 can infect unrelated hosts (Barylski et al., 2017). As such, we wouldn't necessarily  
380 expect specific orders or families of viruses to show the patterns observed in the  
381 bacterial phyla.

382           Finally, we noted an interesting pattern of complete bacterial genome  
383 coverage for select bacteria in the genomes. As these putative contaminants were  
384 not the most abundant members of the microbiome, they are unlikely to represent  
385 random contamination of bulk DNA. Why certain bacterial genomes showed such  
386 high coverage is unclear. One possibility is that we are observing the host species  
387 range of transposable phages. Phages such as the Mu phage randomly integrate  
388 into the host genome (Taylor, 1963), amplify by successive rounds of replicative  
389 transposition, and then can package any section of their host's genome (Hulo et al.,  
390 2011; Toussaint and Rice, 2017). Intriguingly, several of the contaminants detected  
391 here (*e.g.*, *B. vulgatus*, *B. dorei*, *F. prausnitzii* and *B. thetaiotaomicron*) have also  
392 been reported as contaminants in other human gut virome studies (Minot et al.,  
393 2011; Roux et al., 2013), which could indicate host-specificity of Mu phages.  
394 Alternative explanations include vesicle production, gene transfer agents and/or  
395 generalized transduction processes (Biller et al., 2014; McDaniel et al., 2010; Minot  
396 et al., 2011). Further comparisons of whole bacterial genomes recovered in diverse  
397 virome datasets may help shed light on their source, particularly if the same bacterial  
398 species are recovered across multiple studies.

399           **Prospectus** – Our results show that gut microbiome richness and diversity  
400 correlate to virome richness and diversity, and vice-versa. The mechanics  
401 underlying this association remain to be resolved for the human gut. That the two are  
402 coupled may be useful to take into consideration when designing future studies of  
403 the virome and factors affecting. Baseline microbiome diversity may be important to  
404 balance between groups, for instance, prior to assessing the diversity of the virome.

405

## 406   **METHODS**

407           **Selection of concordant and discordant monozygotic twin pairs** - From  
408 16S rRNA gene diversity previously measured for 354 monozygotic twin pairs whose  
409 fecal samples were received between January 28th 2013 and July 14th 2014  
410 (Goodrich et al., 2014), we selected 11 concordant and 13 discordant MZ co-twins  
411 based on three microbiota  $\beta$ -diversity distances within twin pairs: unweighted  
412 UniFrac, weighted UniFrac (Lozupone et al., 2007) and Bray-Curtis (Bray and Curtis,  
413 1957). The twins pairs in the the concordant and the discordant groups were  
414 selected to be balanced between those two groups for age, BMI, and BMI difference  
415 within a twin pair (**TableS1**). Twins within the concordant group ranged in age from  
416 23 to 77 years old and included 5 men and 4 women, while those in the discordant  
417 group ranged in age from 29 to 81 years old with 5 men and 7 women.

418           **Isolation of virus-like particles (VLPs) from human fecal samples** - VLP  
419 isolation procedures were based on the protocol described by (Gudenkauf et al.,  
420 2014) and Minot *et al.* (Minot *et al.*, 2013). For VLP isolation, ~0.5 g of fecal sample  
421 was resuspended by vortexing for 5-10 minutes in 15 ml PBS, previously filtered  
422 through 0.02  $\mu$ m filter (Whatman). The homogenates were centrifuged for 30 min at

423 4,500 xg, and the supernatant was filtered through 0.22 µm polyethersulfone (PES)  
424 Express Plus Millipore Stericup (150 ml) to remove cell debris and bacterial-sized  
425 particles. The filtrate was then concentrated on a Millipore Amicon Ultra-15  
426 Centrifugal Filter Unit 100K to ~1 ml. The concentrate was transferred to 5 Prime  
427 Phase Lock Gel and incubated with 200 µl chloroform for 10 min at room  
428 temperature. After being centrifuged for 1 min at 15,000 xg, the aqueous layer was  
429 transferred to a new microcentrifuge tube, and was treated with Invitrogen TURBO  
430 DNase (14 U), Promega RNase One (20 U) and 1 µl Benzonase Nuclease (E1014  
431 Sigma Benzonase® Nuclease) at 37 °C for 3 hr (Gudenkauf and Hewson, 2016;  
432 Reyes et al., 2012). After incubation, 0.04 volumes 0.5 M EDTA was added to each  
433 sample. The sample was then stored at -80 °C before further processing.

434 **Viral DNA shotgun sequencing** - The viral DNA was extracted with  
435 PureLink® Viral RNA/DNA Mini Kit from Invitrogen™. Each viral DNA sample was  
436 then amplified using GenomePlex® Complete Whole Genome Amplification (WGA2)  
437 Kit from Sigma-Aldrich (Gudenkauf and Hewson, 2016). Two blank controls were  
438 included in this step, but very low yield precluded library construction. The amplified  
439 product was then fragmented with Covaris S2 Adaptive Focused Acoustic Disruptor  
440 with the parameters set as follows: the duty cycle set at 10%, cycle per burst 200,  
441 intensity 4 and duration 60 seconds. Each viral sequencing library was prepared  
442 following Illumina TruSeq DNA Preparation Protocol with one unique barcode per  
443 sample. All barcoded libraries were pooled together. Half of the pool was size  
444 selected by BluePippin (Sage Science, Beverly, MA, USA) to enrich fragments with  
445 longer inserts (425 bp to 875 bp including the adapters). Both pools, the “large-  
446 insert-size library” and the “short-insert-size library”, were sequenced in independent

447 lanes on an Illumina HiSeq 2500 instrument, operating in Rapid Run Mode with 250  
448 bp paired-end chemistry at the Cornell Genomics facility.

449 **Whole fecal metagenome shotgun sequencing** - The genomic DNA was  
450 isolated from an aliquot of ~100 mg from each sample using the PowerSoil® - htp  
451 DNA isolation kit (MoBio Laboratories Ltd, Carlsbad, CA). Each sequencing library  
452 was then prepared following Illumina TruSeq DNA Preparation Protocol with 500 ng  
453 DNA using the gel-free method, 14 cycles of PCR, and with one unique barcode per  
454 sample. Sequencing was performed on an Illumina HiSeq 2500 instrument in Rapid  
455 Run mode with 2x150 bp paired-end chemistry at the Cornell Biotechnology  
456 Resource Center Genomics Facility.

457 **Assessment of Bacterial Contamination** - A set of 8,163 finished bacterial  
458 genomes was retrieved from the NCBI FTP on 21 February 2017. Reads per sample  
459 were mapped against this bacterial genomes dataset using Bowtie2 v.2.2.8  
460 (Langmead and Salzberg, 2012) with the following parameters: --local --maxins 800 -  
461 k=3. Genome coverage per base was calculated considering only reads with a  
462 mapping quality above 20 using *view* and *depth* Samtools commands v.1.5 (Li et al.,  
463 2009). Next, genome coverage was averaged for 100Kbp bins. We observed that  
464 evenly covered genomes had a median bin coverage of at least 100; those genomes  
465 with a median bin coverage greater than 100 were considered as contaminants. The  
466 reads mapping to those genomes were removed. Bacterial genomes can have one  
467 or more prophage(s) in their genomes (Munson-McGee et al., 2018) bursting events  
468 of those prophages can occur, generating several VLPs. As a conservative measure  
469 to avoid the loss of reads originating from prophages and not the bacterial genome  
470 *per se*, bins with a coverage over three standard deviations of the bacterial mean

471 coverage were also identified and catalogued as prophages-like regions. Reads  
472 mapping to potential contaminant genomes were tagged as “contaminants” and  
473 removed from further analysis while reads mapping to high coverage bins were  
474 tagged as “possible prophages”.

475 A matrix of the abundance of each potential contaminant per sample was built  
476 using an in-house Python script and normalized by RPKM. In parallel, from Goodrich  
477 *et al.* data (Goodrich *et al.*, 2014), the relative abundance of each OTU was  
478 recovered and summarized at the species level using `summarize_taxa.py` qiime  
479 script. The Spearman rank order correlation between relative abundances of  
480 contaminants and their corresponding 16S rRNAs data was calculated for species in  
481 both sets.

482 **Functional profiles** - The joined and trimmed reads from the “short-insert-  
483 size library” were mapped onto Integrated Gene Catalogs (IGC), an integrated  
484 catalog of reference genes in the human gut microbiome (Li *et al.*, 2014) by BLASTX  
485 using DIAMOND v.0.7.5 (Buchfink *et al.*, 2015) with maximum e-value cutoff 0.001,  
486 and maximum number of target sequences to report set to 25.

487 After the mapping onto IGC, an abundance matrix was generated using an in-  
488 house Python script. The matrix was then annotated according to the KEGG  
489 annotation of each gene provided by IGC. The annotated abundance matrix was  
490 rarefied (subsampling without replacement) to 2,000,000 read hits per sample. The  
491 KEGG functional profile was then generated using QIIME 1.9 (Quantitative Insights  
492 Into Microbial Ecology) (Caporaso *et al.*, 2010) using the command  
493 `summarize_taxa_through_plots.py`. The Intraclass Correlation Coefficient of the  
494 functional profiles for each group (additional microbiomes, additional viromes,

495 viromes of concordant-microbiome samples and viromes of discordant-microbiome  
496 samples) was calculated using the Psych R package.

497 ***De-novo assembly*** - Reads from the “large-insert-size library” that remain  
498 paired (forward and reverse) after the trimming step were assembled using  
499 Integrated metagenomic assembly pipeline for short reads (InteMAP) (Lai et al.,  
500 2015) with insert size 325 bp  $\pm$  100 bp. Each sample was assembled separately.  
501 After the first run of assembly, all clean reads were mapped to the assembled  
502 contigs using Bowtie2 v.2.2.8 (Langmead and Salzberg, 2012) with the following  
503 parameter: --local --maxins 800. The pairs of reads that aligned concordantly at least  
504 once were then submitted for the second run of assemble by InteMAP. Contigs  
505 larger than 500 bp from all samples were pooled together and compared all vs all,  
506 using an in-house Perl script, on the comparison file it was possible to identify  
507 potential circular genomes, and dereplicate contigs that were contained in over 90%  
508 of their length within another contig.

509 In order to build an abundance matrix, the recruitment of reads to the  
510 dereplicated metagenomic assemblies was used implementing a filter of coverage  
511 and length as recommended in Roux *et al.* (Roux et al., 2017). With this in mind,  
512 reads (not tagged as contaminants in the previous step) were mapped to  
513 dereplicated contigs using Rsubread v.1.28.0 (Liao et al., 2013). Mapping outputs  
514 were parsed using an in-house Python script into an abundance matrix that was  
515 normalized by reads per kilobase of contig length per million sequenced reads per  
516 sample (RPKM) and transformed to  $Log_{10}(x+1)$ , being x the normalized abundance.  
517 Contigs with a normalized coverage bellow 5x were excluded. Finally, to virotypes, a  
518 filter on contig length was applied. A length threshold was chosen as the elbow of

519 the decay curve generated when plotting the number of contigs as a function of  
520 length, which occurred at a length of 1,300 bp.

521 **HMM annotation** - Independent HMM profiles were built to identify crAss-like  
522 contigs and Microviridae contigs. To build the HMM-crAsslike profile, sequences for  
523 the Major Capsid Protein (MCP) of the proposed crAss-like family (Yutin et al., 2018)  
524 were retrieved from [ftp.ncbi.nih.gov/pub/yutinn/crassphage\\_2017/](ftp.ncbi.nih.gov/pub/yutinn/crassphage_2017/). Multiple  
525 sequence alignments (MSA) were done using MUSCLE v.3.8.31 (Edgar, 2004) and  
526 inspected using UGENE v.1.31.0 (Okonechnikov et al., 2012); positions with more  
527 than 30% of gaps were removed. Finally, the HMM-crAsslike profile was built using  
528 *hmmbuild* from the HMMER package v.3.1b2 (<http://hmmer.org/>) (Eddy, 1998). For  
529 the Microviridae case, all HMM-profiles for the viral protein 1 (VP1) developed by  
530 Alves *et al.* (Alves et al., 2016) were adopted.

531 Predicted proteins of the assembled contigs were queried for matching the  
532 HMM-profiles using *hmmsearch* (Eddy, 1998). Matching proteins with an e-value  
533 below  $1 \times 10^{-5}$  were considered as true homologs but only proteins between the size  
534 rank of the reference proteins (crAsslike MCP: 450-510 residues; Microviridae: 450-  
535 800 residues), a coverage of at least 50% and a percentage of identity of at least  
536 40% to at least one reference sequence were used for further analysis. Coverage  
537 and identity percentage were determined making a BLASTp of the true homologues  
538 against the reference sequences.

539 True homologues passing the filters mentioned above were used in  
540 phylogenetic analysis. Reference and homologous sequences were aligned using  
541 MUSCLE v.3.8.31 and sites with at least 30% of gaps were removed using UGENE  
542 v.1.31.0. A maximum-likelihood (ML) phylogenetic analysis was done using RAxML

543 v.8.2.4 (Stamatakis, 2014), the best evolutive model was obtained with protest  
544 v.3.4.2 (Darriba et al., 2011) and support for nodes in the ML trees were obtained by  
545 bootstrap with 100 pseudoreplicates.

546       **Taxonomic profiles** - To infer the taxonomic affiliation of the assembled  
547 VLPs, genes were predicted from all assembled contigs larger than 500 bp using  
548 GeneMarkS v.4.32 (Besemer et al., 2001). The amino acid sequence of the  
549 predicted genes was then used in a BLASTp search against the NR NCBI viral  
550 database using DIAMOND v.0.7.5 (Buchfink et al., 2015) with maximum e-value  
551 cutoff 0.001 and maximum number of target sequences to report set to 25. Using the  
552 BLASTp results, the taxonomy of each gene was assigned by the lowest-common-  
553 ancestor algorithm in MEtaGenome ANalyzer (MEGAN5) v.5.11.3 (Huson et al.,  
554 2011) with the following parameters: Min Support: 1, Min Score: 40.0, Max Expected:  
555 0.01, Top Percent: 10.0, Min-Complexity filter: 0.44. Independently, the taxonomy  
556 annotation of each contig was obtained using CENTRIFUGE v.1.0.4 (Kim et al.,  
557 2016) against the NT NCBI viral genomes database. The final taxonomic annotation  
558 of each contig was then assigned using a voting system where the taxonomic  
559 annotation of each protein and the CENTRIFUGE annotation of the contig were  
560 considered as votes. With all the possible votes for a contig, an N-ary tree was build  
561 and the weight of each node was the number of votes including that node. The  
562 taxonomic annotation of a contig will be the result of traverse the tree passing  
563 through the heaviest nodes with one consideration: if all children nodes of a node  
564 have the same weight the traversing must be stopped. The taxonomic profile was  
565 considered as a subset of the recruitment matrix containing all contigs annotated  
566 either by the voting system or annotated through the HMM profiles (see above).



567           **Prediction of phage-host interaction** - Clustered Regularly Interspaced  
568 Short Palindromic Repeats (CRISPRs) were identified using the PilerCR program  
569 v.1.06 (Edgar, 2007) from the same set of 8,163 bacterial used to asses the bacterial  
570 contamination. Spacers within the expected size of 20 bp and 72 bp (Horvath and  
571 Barrangou, 2010) were used as queries against virotypes and taxonomically  
572 annotated contigs using BLASTn (v.2.6.0+) with short query parameters (Camacho  
573 et al., 2009). Matches covering at least 90% of the spacer and with an e-value <  
574 0.001 were considered to be CRISPR spacer-virus associations. Additionally,  
575 virotypes and taxonomically annotated contigs were mapped against the  
576 representatives genomes of the viral clusters in the MVP database (Gao et al., 2018)  
577 using LAST-959 (Kielbasa et al., 2011). As viral clusters in MVP comprise  
578 sequences that have at least 95% identity along at least 80% of their lengths, only  
579 matches that fulfill those constraints were kept. The host(s) of a contig was  
580 determined from its matching viral cluster.

581           **Diversity indexes** - The Shannon diversity index within-samples ( $\alpha$ -diversity)  
582 and the Hellinger distance within co-twins ( $\beta$ -diversity) were calculated using  
583 *diversity* and *vegdist* functions of Vegan R package for all three abundance matrices  
584 generated (function, taxonomy and read recruitment matrices). Correlations between  
585 virome  $\alpha$ -diversity and microbiome  $\alpha$ -diversity were measured using the Pearson  
586 correlation coefficient. Correlations between viromes  $\beta$ -diversity and the  
587 microbiomes  $\beta$ -diversity was computed with a the Mantel test using the Pearson  
588 correlation coefficient. Additionally, the  $\beta$ -diversity between concordant MZ co-twins  
589 was compared to the  $\beta$ -diversity between discordant MZ co-twins; p values were  
590 calculated using Mann-Whitney U test.

## 591 **DATA AND SOFTWARE AVAILABILITY**

592 Jupyter notebooks and scripts describing the data analysis process are  
593 available on GitHub at [https://github.com/leylabmpi/TwinsUK\\_viroome](https://github.com/leylabmpi/TwinsUK_viroome)  
594 The sequence data have been deposited in the European Nucleotide Archive under  
595 the study accession number PRJEB29491.

## 596 **ACKNOWLEDGEMENTS**

597 We thank Laura Avellaneda-Franco for the discussion and contribution in the  
598 development of the strategy to remove bacterial contaminants of viromes. This work  
599 was supported by grants from the NIH: NIDDK RO1 DK093595 and DP2 OD007444,  
600 the Max Planck Society, and the David and Lucile Packard Foundation. The  
601 TwinsUK cohort is supported by the Wellcome Trust; European Community's  
602 Seventh Framework Programme (FP7/2007–2013); National Institute for Health  
603 Research (NIHR)- funded BioResource, Clinical Research Facility and Biomedical  
604 Research Centre based at Guy's and St Thomas' NHS Foundation Trust in  
605 partnership with King's College London.

## 606 **AUTHOR CONTRIBUTIONS**

607 RL and SPC designed the study. TS and JB were involved in sample  
608 collection. SPC and IH generated the data. JLM-G, SPC, JKG, NY, AR and RL  
609 analyzed the data. JLM-G, SPC, SCD, AR and RL wrote the manuscript. All authors  
610 read and approved the final manuscript.

## 611 **DECLARATION OF INTERESTS**

612 The authors declare no competing interests.

## 613 REFERENCES

- 614 Alves, J.M.P., de Oliveira, A.L., Sandberg, T.O.M., Moreno-Gallego, J.L., de Toledo,  
615 M.A.F., de Moura, E.M.M., Oliveira, L.S., Durham, A.M., Mehnert, D.U., Zanotto,  
616 P.M. de A., et al. (2016). GenSeed-HMM: A tool for progressive assembly using  
617 profile HMMs as seeds and its application in Alpavirinae viral discovery from  
618 metagenomic data. *Front. Microbiol.* 7, 269.
- 619 Barylski, J., Enault, F., Dutilh, B.E., Schuller, M.B.P., Edwards, R.A., Gillis, A.,  
620 Klumpp, J., Knezevic, P., Krupovic, M., Kuhn, J.H., et al. (2017). Genomic,  
621 proteomic, and phylogenetic analysis of spounaviruses indicates paraphyly of the  
622 order Caudovirales.
- 623 Besemer, J., Lomsadze, A., and Borodovsky, M. (2001). GeneMarkS: a self-training  
624 method for prediction of gene starts in microbial genomes. Implications for finding  
625 sequence motifs in regulatory regions. *Nucleic Acids Res.* 29, 2607–2618.
- 626 Biller, S.J., Schubotz, F., Roggensack, S.E., Thompson, A.W., Summons, R.E., and  
627 Chisholm, S.W. (2014). Bacterial vesicles in marine ecosystems. *Science* 343, 183–  
628 186.
- 629 Bray, J.R., and Curtis, J.T. (1957). An Ordination of the Upland Forest Communities  
630 of Southern Wisconsin. *Ecol. Monogr.* 27, 326–349.
- 631 Breitbart, M., Hewson, I., Felts, B., Mahaffy, J.M., Nulton, J., Salamon, P., and  
632 Rohwer, F. (2003). Metagenomic analyses of an uncultured viral community from  
633 human feces. *J. Bacteriol.* 185, 6220–6223.
- 634 Breitbart, M., Haynes, M., Kelley, S., Angly, F., Edwards, R.A., Felts, B., Mahaffy,  
635 J.M., Mueller, J., Nulton, J., Rayhawk, S., et al. (2008). Viral diversity and dynamics  
636 in an infant gut. *Res. Microbiol.* 159, 367–373.
- 637 Buchfink, B., Xie, C., and Huson, D.H. (2015). Fast and sensitive protein alignment  
638 using DIAMOND. *Nat. Methods* 12, 59–60.
- 639 Camacho, C., Coulouris, G., Avagyan, V., Ma, N., Papadopoulos, J., Bealer, K., and  
640 Madden, T.L. (2009). BLAST+: architecture and applications. *BMC Bioinformatics*  
641 10, 421.
- 642 Caporaso, J.G., Kuczynski, J., Stombaugh, J., Bittinger, K., Bushman, F.D., Costello,  
643 E.K., Fierer, N., Peña, A.G., Goodrich, J.K., Gordon, J.I., et al. (2010). QIIME allows  
644 analysis of high-throughput community sequencing data. *Nat. Methods* 7, 335–336.
- 645 Castro-Mejía, J.L., Muhammed, M.K., Kot, W., Neve, H., Franz, C.M.A.P., Hansen,  
646 L.H., Vogensen, F.K., and Nielsen, D.S. (2015). Optimizing protocols for extraction of  
647 bacteriophages prior to metagenomic analyses of phage communities in the human  
648 gut. *Microbiome* 3, 64.
- 649 Claesson, M.J., Jeffery, I.B., Conde, S., Power, S.E., O'Connor, E.M., Cusack, S.,  
650 Harris, H.M.B., Coakley, M., Lakshminarayanan, B., O'Sullivan, O., et al. (2012). Gut  
651 microbiota composition correlates with diet and health in the elderly. *Nature* 488,

- 652 178–184.
- 653 Colson, P., Fancello, L., Gimenez, G., Armougom, F., Desnues, C., Fournous, G.,  
654 Yoosuf, N., Million, M., La Scola, B., and Raoult, D. (2013). Evidence of the  
655 megavirome in humans. *J. Clin. Virol.* *57*, 191–200.
- 656 Cotillard, A., Kennedy, S.P., Kong, L.C., Prifti, E., Pons, N., Le Chatelier, E.,  
657 Almeida, M., Quinquis, B., Levenez, F., Galleron, N., et al. (2013). Dietary  
658 intervention impact on gut microbial gene richness. *Nature* *500*, 585–588.
- 659 Darriba, D., Taboada, G.L., Doallo, R., and Posada, D. (2011). ProtTest 3: fast  
660 selection of best-fit models of protein evolution. *Bioinformatics* *27*, 1164–1165.
- 661 David, L.A., Materna, A.C., Friedman, J., Campos-Baptista, M.I., Blackburn, M.C.,  
662 Perrotta, A., Erdman, S.E., and Alm, E.J. (2014). Host lifestyle affects human  
663 microbiota on daily timescales. *Genome Biol.* *15*, R89.
- 664 De Filippo, C., Cavalieri, D., Di Paola, M., Ramazzotti, M., Poullet, J.B., Massart, S.,  
665 Collini, S., Pieraccini, G., and Lionetti, P. (2010). Impact of diet in shaping gut  
666 microbiota revealed by a comparative study in children from Europe and rural Africa.  
667 *Proc. Natl. Acad. Sci. U. S. A.* *107*, 14691–14696.
- 668 Dutilh, B.E., Cassman, N., McNair, K., Sanchez, S.E., Silva, G.G.Z., Boling, L., Barr,  
669 J.J., Speth, D.R., Seguritan, V., Aziz, R.K., et al. (2014). A highly abundant  
670 bacteriophage discovered in the unknown sequences of human faecal  
671 metagenomes. *Nat. Commun.* *5*, 4498.
- 672 Eddy, S.R. (1998). Profile hidden Markov models. *Bioinformatics* *14*, 755–763.
- 673 Edgar, R.C. (2004). MUSCLE: multiple sequence alignment with high accuracy and  
674 high throughput. *Nucleic Acids Res.* *32*, 1792–1797.
- 675 Edgar, R.C. (2007). PILER-CR: fast and accurate identification of CRISPR repeats.  
676 *BMC Bioinformatics* *8*, 18.
- 677 Gao, N.L., Zhang, C., Zhang, Z., Hu, S., Lercher, M.J., Zhao, X.-M., Bork, P., Liu, Z.,  
678 and Chen, W.-H. (2018). MVP: a microbe–phage interaction database. *Nucleic Acids*  
679 *Res.* *46*, D700–D707.
- 680 Goodrich, J.K., Waters, J.L., Poole, A.C., Sutter, J.L., Koren, O., Blehman, R.,  
681 Beaumont, M., Van Treuren, W., Knight, R., Bell, J.T., et al. (2014). Human genetics  
682 shape the gut microbiome. *Cell* *159*, 789–799.
- 683 Goodrich, J.K., Davenport, E.R., Beaumont, M., Jackson, M.A., Knight, R., Ober, C.,  
684 Spector, T.D., Bell, J.T., Clark, A.G., and Ley, R.E. (2016). Genetic determinants of  
685 the gut microbiome in UK Twins. *Cell Host Microbe* *19*, 731–743.
- 686 Gudenkauf, B.M., and Hewson, I. (2016). Comparative metagenomics of viral  
687 assemblages inhabiting four phyla of marine invertebrates. *Frontiers in Marine*  
688 *Science* *3*, 23.
- 689 Gudenkauf, B.M., Eaglesham, J.B., Aragundi, W.M., and Hewson, I. (2014).

- 690 Discovery of urchin-associated densoviruses (family Parvoviridae) in coastal waters  
691 of the Big Island, Hawaii. *J. Gen. Virol.* **95**, 652–658.
- 692 Halary, S., Temmam, S., Raoult, D., and Desnues, C. (2016). Viral metagenomics:  
693 are we missing the giants? *Curr. Opin. Microbiol.* **31**, 34–43.
- 694 Horvath, P., and Barrangou, R. (2010). CRISPR/Cas, the immune system of bacteria  
695 and archaea. *Science* **327**, 167–170.
- 696 Hoyles, L., McCartney, A.L., Neve, H., Gibson, G.R., Sanderson, J.D., Heller, K.J.,  
697 and van Sinderen, D. (2014). Characterization of virus-like particles associated with  
698 the human faecal and caecal microbiota. *Res. Microbiol.* **165**, 803–812.
- 699 Hulo, C., de Castro, E., Masson, P., Bougueleret, L., Bairoch, A., Xenarios, I., and Le  
700 Mercier, P. (2011). ViralZone: a knowledge resource to understand virus diversity.  
701 *Nucleic Acids Res.* **39**, D576–D582.
- 702 Huson, D.H., Mitra, S., Ruscheweyh, H.-J., Weber, N., and Schuster, S.C. (2011).  
703 Integrative analysis of environmental sequences using MEGAN4. *Genome Res.* **21**,  
704 1552–1560.
- 705 Kiełbasa, S.M., Wan, R., Sato, K., Horton, P., and Frith, M.C. (2011). Adaptive seeds  
706 tame genomic sequence comparison. *Genome Res.* **21**, 487–493.
- 707 Kim, D., Song, L., Breitwieser, F.P., and Salzberg, S.L. (2016). Centrifuge: rapid and  
708 sensitive classification of metagenomic sequences. *Genome Res.* **26**, 1721–1729.
- 709 Knowles, B., Silveira, C.B., Bailey, B.A., Barott, K., Cantu, V.A., Cobián-Güemes,  
710 A.G., Coutinho, F.H., Dinsdale, E.A., Felts, B., Furby, K.A., et al. (2016). Lytic to  
711 temperate switching of viral communities. *Nature* **531**, 466–470.
- 712 Lai, B., Wang, F., Wang, X., Duan, L., and Zhu, H. (2015). InteMAP: Integrated  
713 metagenomic assembly pipeline for NGS short reads. *BMC Bioinformatics* **16**, 1–14.
- 714 Langmead, B., and Salzberg, S.L. (2012). Fast gapped-read alignment with Bowtie  
715 2. *Nat. Methods* **9**, 357–359.
- 716 Lee, S., Sung, J., Lee, J., and Ko, G. (2011). Comparison of the gut microbiotas of  
717 healthy adult twins living in South Korea and the United States. *Appl. Environ.*  
718 *Microbiol.* **77**, 7433–7437.
- 719 Li, H., Handsaker, B., Wysoker, A., Fennell, T., Ruan, J., Homer, N., Marth, G.,  
720 Abecasis, G., Durbin, R., and 1000 Genome Project Data Processing Subgroup  
721 (2009). The sequence alignment/map format and SAMtools. *Bioinformatics* **25**,  
722 2078–2079.
- 723 Li, J., Jia, H., Cai, X., Zhong, H., Feng, Q., Sunagawa, S., Arumugam, M., Kultima,  
724 J.R., Prifti, E., Nielsen, T., et al. (2014). An integrated catalog of reference genes in  
725 the human gut microbiome. *Nat. Biotechnol.* **32**, 834–841.
- 726 Liao, Y., Smyth, G.K., and Shi, W. (2013). The Subread aligner: fast, accurate and  
727 scalable read mapping by seed-and-vote. *Nucleic Acids Res.* **41**, e108.

- 728 Lim, E.S., Zhou, Y., Zhao, G., Bauer, I.K., Droit, L., Ndao, I.M., Warner, B.B., Tarr,  
729 P.I., Wang, D., and Holtz, L.R. (2015). Early life dynamics of the human gut virome  
730 and bacterial microbiome in infants. *Nat. Med.* *21*, 1228–1234.
- 731 Lozupone, C.A., Hamady, M., Kelley, S.T., and Knight, R. (2007). Quantitative and  
732 qualitative beta diversity measures lead to different insights into factors that structure  
733 microbial communities. *Appl. Environ. Microbiol.* *73*, 1576–1585.
- 734 Manrique, P., Bolduc, B., Walk, S.T., van der Oost, J., de Vos, W.M., and Young,  
735 M.J. (2016). Healthy human gut phageome. *Proc. Natl. Acad. Sci. U. S. A.* *113*,  
736 10400–10405.
- 737 Manrique, P., Dills, M., and Young, M.J. (2017). The human gut phage community  
738 and its implications for health and disease. *Viruses* *9*, 10.3390/v9060141.
- 739 McDaniel, L.D., Young, E., Delaney, J., Ruhnau, F., Ritchie, K.B., and Paul, J.H.  
740 (2010). High frequency of horizontal gene transfer in the oceans. *Science* *330*, 50.
- 741 Minot, S., Sinha, R., Chen, J., Li, H., Keilbaugh, S.A., Wu, G.D., Lewis, J.D., and  
742 Bushman, F.D. (2011). The human gut virome: inter-individual variation and dynamic  
743 response to diet. *Genome Res.* *21*, 1616–1625.
- 744 Minot, S., Bryson, A., Chehoud, C., Wu, G.D., Lewis, J.D., and Bushman, F.D.  
745 (2013). Rapid evolution of the human gut virome. *Proc. Natl. Acad. Sci. U. S. A.* *110*,  
746 12450–12455.
- 747 Munson-McGee, J.H., Peng, S., Dewerff, S., Stepanauskas, R., Whitaker, R.J.,  
748 Weitz, J.S., and Young, M.J. (2018). A virus or more in (nearly) every cell: ubiquitous  
749 networks of virus-host interactions in extreme environments. *ISME J.*
- 750 Ogilvie, L.A., and Jones, B.V. (2017). The human gut virome: form and function.  
751 *Emerging Topics in Life Sciences* *1*, 351–362.
- 752 Okonechnikov, K., Golosova, O., Fursov, M., and UGENE team (2012). Unipro  
753 UGENE: a unified bioinformatics toolkit. *Bioinformatics* *28*, 1166–1167.
- 754 Palmer, C., Bik, E.M., DiGiulio, D.B., Relman, D.A., and Brown, P.O. (2007).  
755 Development of the human infant intestinal microbiota. *PLoS Biol.* *5*, e177.
- 756 Reyes, A., Haynes, M., Hanson, N., Angly, F.E., Heath, A.C., Rohwer, F., and  
757 Gordon, J.I. (2010). Viruses in the faecal microbiota of monozygotic twins and their  
758 mothers. *Nature* *466*, 334–338.
- 759 Reyes, A., Semenkovich, N.P., Whiteson, K., Rohwer, F., and Gordon, J.I. (2012).  
760 Going viral: next-generation sequencing applied to phage populations in the human  
761 gut. *Nat. Rev. Microbiol.* *10*, 607–617.
- 762 Reyes, A., Wu, M., McNulty, N.P., Rohwer, F.L., and Gordon, J.I. (2013). Gnotobiotic  
763 mouse model of phage-bacterial host dynamics in the human gut. *Proc. Natl. Acad.*  
764 *Sci. U. S. A.* *110*, 20236–20241.
- 765 Reyes, A., Blanton, L.V., Cao, S., Zhao, G., Manary, M., Trehan, I., Smith, M.I.,



- 766 Wang, D., Virgin, H.W., Rohwer, F., et al. (2015). Gut DNA viromes of Malawian  
767 twins discordant for severe acute malnutrition. *Proc. Natl. Acad. Sci. U. S. A.* *112*,  
768 11941–11946.
- 769 Rodriguez-Brito, B., Li, L., Wegley, L., Furlan, M., Angly, F., Breitbart, M., Buchanan,  
770 J., Desnues, C., Dinsdale, E., Edwards, R., et al. (2010). Viral and microbial  
771 community dynamics in four aquatic environments. *ISME J.* *4*, 739–751.
- 772 Rodriguez-Valera, F., Martin-Cuadrado, A.-B., Rodriguez-Brito, B., Pasić, L.,  
773 Thingstad, T.F., Rohwer, F., and Mira, A. (2009). Explaining microbial population  
774 genomics through phage predation. *Nat. Rev. Microbiol.* *7*, 828–836.
- 775 Roux, S., Krupovic, M., Debroas, D., Forterre, P., and Enault, F. (2013). Assessment  
776 of viral community functional potential from viral metagenomes may be hampered by  
777 contamination with cellular sequences. *Open Biol.* *3*, 130160.
- 778 Roux, S., Emerson, J.B., Eloë-Fadrosh, E.A., and Sullivan, M.B. (2017).  
779 Benchmarking viromics: an in silico evaluation of metagenome-enabled estimates of  
780 viral community composition and diversity. *PeerJ* *5*, e3817.
- 781 Sender, R., Fuchs, S., and Milo, R. (2016). Are we really vastly outnumbered?  
782 revisiting the ratio of bacterial to host cells in humans. *Cell* *164*, 337–340.
- 783 Shkoporov, A., Khokhlova, E.V., Brian Fitzgerald, C., Stockdale, S.R., Draper, L.A.,  
784 Paul Ross, R., and Hill, C. (2018).  $\Phi$ CrAss001, a member of the most abundant  
785 bacteriophage family in the human gut, infects *Bacteroides*.
- 786 Stamatakis, A. (2014). RAxML version 8: a tool for phylogenetic analysis and post-  
787 analysis of large phylogenies. *Bioinformatics* *30*, 1312–1313.
- 788 Suttle, C.A. (2007). Marine viruses--major players in the global ecosystem. *Nat. Rev.*  
789 *Microbiol.* *5*, 801–812.
- 790 Taylor, A.L. (1963). Bacteriophage-induced mutation in *Escherichia coli*. *Proc. Natl.*  
791 *Acad. Sci. U. S. A.* *50*, 1043–1051.
- 792 Thingstad, T.F. (2000). Elements of a theory for the mechanisms controlling  
793 abundance, diversity, and biogeochemical role of lytic bacterial viruses in aquatic  
794 systems. *Limnol. Oceanogr.* *45*, 1320–1328.
- 795 Thingstad, T.F., Våge, S., Storesund, J.E., Sandaa, R.-A., and Giske, J. (2014). A  
796 theoretical analysis of how strain-specific viruses can control microbial species  
797 diversity. *Proc. Natl. Acad. Sci. U. S. A.* *111*, 7813–7818.
- 798 Tims, S., Derom, C., Jonkers, D.M., Vlietinck, R., Saris, W.H., Kleerebezem, M., de  
799 Vos, W.M., and Zoetendal, E.G. (2013). Microbiota conservation and BMI signatures  
800 in adult monozygotic twins. *ISME J.* *7*, 707–717.
- 801 Toussaint, A., and Rice, P.A. (2017). Transposable phages, DNA reorganization and  
802 transfer. *Curr. Opin. Microbiol.* *38*, 88–94.
- 803 Turnbaugh, P.J., Hamady, M., Yatsunenko, T., Cantarel, B.L., Duncan, A., Ley, R.E.,

- 804 Sogin, M.L., Jones, W.J., Roe, B.A., Affourtit, J.P., et al. (2009). A core gut  
805 microbiome in obese and lean twins. *Nature* 457, 480–484.
- 806 Weitz, J.S., and Dushoff, J. (2008). Alternative stable states in host–phage  
807 dynamics. *Theor. Ecol.* 1, 13–19.
- 808 Wu, G.D., Chen, J., Hoffmann, C., Bittinger, K., Chen, Y.-Y., Keilbaugh, S.A.,  
809 Bewtra, M., Knights, D., Walters, W.A., Knight, R., et al. (2011). Linking long-term  
810 dietary patterns with gut microbial enterotypes. *Science* 334, 105–108.
- 811 Yarygin, K., Tyakht, A., Larin, A., Kostryukova, E., Kolchenko, S., Bitner, V., and  
812 Alexeev, D. (2017). Abundance profiling of specific gene groups using precomputed  
813 gut metagenomes yields novel biological hypotheses. *PLoS One* 12, e0176154.
- 814 Yatsunencko, T., Rey, F.E., Manary, M.J., Trehan, I., Dominguez-Bello, M.G.,  
815 Contreras, M., Magris, M., Hidalgo, G., Baldassano, R.N., Anokhin, A.P., et al.  
816 (2012). Human gut microbiome viewed across age and geography. *Nature* 486, 222–  
817 227.
- 818 Yutin, N., Makarova, K.S., Gussow, A.B., Krupovic, M., Segall, A., Edwards, R.A.,  
819 and Koonin, E.V. (2018). Discovery of an expansive bacteriophage family that  
820 includes the most abundant viruses from the human gut. *Nat Microbiol* 3, 38–46.
- 821
- 822



## 823 **FIGURE TITLES AND LEGENDS**

824 **Figure 1. Microbiome discordance in twin pairs. (A)** The  $\beta$ -diversity  
825 measures of the microbiotas of 354 monozygotic twin pairs from a previous study  
826 (Goodrich et al., 2014) are shown. Each dot represents the  $\beta$ -diversity of a pair of  
827 twins, measured by the weighted UniFrac (x-axis), unweighted UniFrac (z-axis), and  
828 Bray-Curtis (y-axis)  $\beta$ -diversity metrics. The three  $\beta$ -diversity metrics are in general  
829 correlated (Pearson pairwise correlation coefficient > 0.4). The plane is the least  
830 squared fitted plane Bray-Curtis ~ Weighted UniFrac + Unweighted UniFrac. A  
831 subset of twin pairs with concordant microbiotas (blue) and discordant microbiotas  
832 (orange) were chosen from the two edges. Black dots indicate the samples used for  
833 virome and whole fecal metagenome comparison. **(B)** Comparison of the taxonomic  
834 profiles (relative abundance) at the Phylum level for the 21 MZ twin pairs concordant  
835 (1-9) or discordant (10-21) for their microbiotas. **(C)** Differences in the relative  
836 abundances for the major phyla for concordant (blue points, n=9) and discordant  
837 (orange points, n=12) twin pairs. Mann-Whitney's U test. \*\*\*  $p < 0.0005$ , \*  $p = 0.055$   
838

839 **Figure 2. Bacterial contamination in VLP preparations. (A)** Heatmap of  
840 VLP reads from sample 4A mapping to bacterial genomes before and after the  
841 removal of reads determined as contaminants. Genomes are sorted by length and  
842 split in bins of 100,000 bp. Bacterial genomes with a median coverage greater than  
843 100 were considered as contaminants. **(B)** Cladogram based on the NCBI taxonomy  
844 of the 65 genomes identified as contaminants across all VLP extractions. **(Right)**  
845 Spearman rank correlation coefficient ( $\rho$ ) between the abundance of the bacterial  
846 genomes in the VLP extractions and 16S rRNA gene profile from the microbiome.  
847 **(Left)** Total abundance of each bacterial genome added across all individuals.

848

849 **Figure 3. Comparison of the gene content of whole fecal metagenomes**  
850 **and viromes.** Relative abundance of KEGG categories in whole fecal metagenomes  
851 and viromes. **(A)** The relative abundance of KEGG categories in whole fecal  
852 metagenomes and viromes, including all hits to IGC genes, regardless of the  
853 annotation. **(B)** Heatmap of the relative abundance of the second level of KEGG  
854 categories in whole fecal metagenomes and viromes, excluding the IGC genes with  
855 unknown annotation. A.V.: Additional viromes; A.M.: Additional microbiomes (whole  
856 genome extractions). Intra-class coefficient (ICC) for A.M. = 0.99; ICC for A.V. =  
857 0.85; ICC concordant-microbiome co-twins = 0.69; ICC discordant-microbiome co-  
858 twins = 0.68.

859

860 **Figure 4. Virome composition.** Comparison of the taxonomic profiles at the  
861 Family level for the 21 MZ twin pairs concordant (1-9) or discordant (10-21) for their  
862 viromes. **(A)** The viral family composition of the MZ twins. **(B)** Differences of the  
863 relative abundances of each family for concordant (blue points, n=9) and discordant  
864 (orange points, n=12) twin pairs.

865

866 **Figure 5. Bacteriophages diversity correlates with microbiome diversity**  
867 **but eukaryotic viruses diversity do not.** **(A)** Correlation of Shannon  $\alpha$ -diversity of  
868 viromes to Shannon  $\alpha$ -diversity of microbiomes (n=42). **i) Virotypes:** Pearson  
869 correlation coefficient = 0.406,  $m = 0.3$ ,  $p = 0.007$ ,  $R^2 = 0.165$ ; **ii) Taxonomy:**  
870 Pearson correlation coefficient = 0.389,  $m = 0.25$ ,  $p = 0.010$ ,  $R^2 = 0.151$ ; **iii) Genes:**  
871 Pearson correlation coefficient = 0.105,  $m = 0.11$ ,  $p = 0.506$ ,  $R^2 = 0.011$  **(B)**  
872 Correlation of the Shannon  $\alpha$ -diversity of the virome, calculated from contigs

873 annotated as ssDNA eukaryotic viruses, ssDNA phages, dsDNA eukaryotic viruses,  
874 and dsDNA phages, to Shannon  $\alpha$ -diversity of the microbiome (n=42). **ssDNA**  
875 **eukaryotic viruses:** Pearson correlation coefficient = 0.027, m = 0.034, p = 0.863,  
876  $R^2 = 0.000751$ ; **ssDNA bacteriophages:** Pearson correlation coefficient = 0.394, m  
877 = 0.35, p = 0.009,  $R^2 = 0.155$ ; **dsDNA eukaryotic viruses:** Pearson correlation  
878 coefficient = 0.143, m = 0.15, p = 0.368,  $R^2 = 0.020$ ; **dsDNA bacteriophages:**  
879 Pearson correlation coefficient = 0.400, m = 0.25, p = 0.008,  $R^2 = 0.16$ .

880

881 **Figure 6. Virome Beta-diversity patterns mirror microbiome Beta-**  
882 **diversity.** Box plots show the distribution of Hellinger distances for microbiomes and  
883 viromes, according to the three different layers of information recovered (virotypes,  
884 function, and taxonomy), for concordant co-twins (blue, n=9), discordant co-twins  
885 (orange, n=12), unrelated samples within the concordant co-twins (blue edges,  
886 n=144), and unrelated samples within the discordant co-twins (orange edges,  
887 n=264). Significant differences between means (Mann-Whitney's U test, p < 0.020)  
888 are denoted with different letters.

889

## 890 SUPPLEMENTAL INFORMATION LEGENDS

891 **Figure S1.** Schematic representation summarizing the procedures applied to  
892 **(left)** the “large-insert-size library” and **(right)** the “short-insert-size library” to obtain  
893 three different layers of information used to analyze the virome diversity of the  
894 microbiome-concordant and microbiome-discordant co-twins.

895

896 **Figure S2.** Box plots showing the distribution of the number of shared  
897 virotypes between different groups made from the 21 MZ co-twins. (Up left) All co-

898 twins vs unrelated individuals. (Up right) Microbiome-discordant co-twins vs  
899 unrelated individuals in the same group. (Down left) Microbiome-concordant co-twins  
900 vs unrelated individuals in the same group. (Down right) Microbiome-concordant co-  
901 twins vs microbiome-discordant co-twins. Mann-Whitney's U test. \*  $p < 0.05$ ; n.s: not  
902 significant difference.

903

904 **Figure S3.** Maximum likelihood phylogenetic analysis of **(A)** the VP1 protein  
905 of *Microviridae* phages and **(B)** the MCP protein of crAssphage found in the 42 MZ  
906 viromes. Reference sequences are in purple, outgroup sequences are in red while  
907 the different MCP or VP1 proteins found in this work are labeled in black. Circles in  
908 the nodes indicates bootstrap values above 70%.

909

910 **Figure S4.** Cladogram based on the NCBI taxonomy showing the bacteria  
911 identified as hosts. The cladogram is summarized by genus, and clades are colored  
912 by Phylum. Blue: Firmicutes; Red: Actinobacteria; Yellow: Tenericutes; Green:  
913 Proteobacteria; Purple: Bacteroidetes; Light green: Fusobacteria; Magenta:  
914 Verrucomicrobia; Light blue: Euryarchaeota. Red bars indicate the number of  
915 species in each genus, and green bars show the dereplicated number of contigs  
916 associated to each genus (i.e. if a contig was found associated to two species in that  
917 genus, it is only shown one time).

918

919 **Figure S5.** Box plots showing the distribution of **(A)** the Jaccard distances  
920 and **(B)** Bray-Curtis distances for microbiomes and viromes, according to the three  
921 different layers of information recovered (virotypes, function and taxonomy).  
922 Significant differences between means (Mann-Whitney's U test) are denoted with

923 different letters. Groups and n values as in Figure 6. **(C) Correlation between virome**  
924  $\beta$ -diversity and microbiome  $\beta$ -diversity (n=840). **i) Virotypes:** Pearson correlation  
925 coefficient among all individuals = 0.382 ( $p = 0.0005$ , Mantel test),  $m = 0.167$ ,  $p = 0$ ,  
926  $R^2 = 0.157$ ; Pearson correlation coefficient among co-twins = 0.522,  $m = 0.188$ ,  $p =$   
927 0.015,  $R^2 = 0.1508$  ; **ii) Taxonomy annotated contigs:** Pearson correlation  
928 coefficient among all individuals = 0.266 ( $p = 0.003$ , Mantel test),  $m = 0.140$ ,  $p = 0$ ,  
929  $R^2 = 0.0796$ ; Pearson correlation coefficient among co-twins = 0.512,  $m = 0.186$ ,  $p =$   
930 0.017,  $R^2 = 0.224$ ; **iii) Genes:** Pearson correlation coefficient among all individuals =  
931 0.344 ( $p = 0.0009$ , Mantel test),  $m = 0.162$ ,  $p = 0$ ,  $R^2 = 0.123$ ; Pearson correlation  
932 coefficient among co-twins = 0.53,  $m = 0.182$ ,  $p = 0.012$ ,  $R^2 = 0.248$ . Lines describe  
933 linear regressions of pairwise distances among all individuals. Triangles indicate  
934 concordant-microbiome co-twins and squares indicate discordant-microbiome co-  
935 twins.

936

937 **Table S1.** Additional information pertaining to the 21 selected MZ twin pairs  
938 (metadata), and counts of viromes reads and contigs per sample.

939

940 **Table S2.** Median bin coverage of bacterial genomes by VLP reads per  
941 sample.

# Figure 1.

bioRxiv preprint doi: <https://doi.org/10.1101/509273>; this version posted January 2, 2019. The copyright holder for this preprint (which was not certified by peer review) is the author/funder, who has granted bioRxiv a license to display the preprint in perpetuity. It is made available under aCC-BY-NC-ND 4.0 International license.

**A**

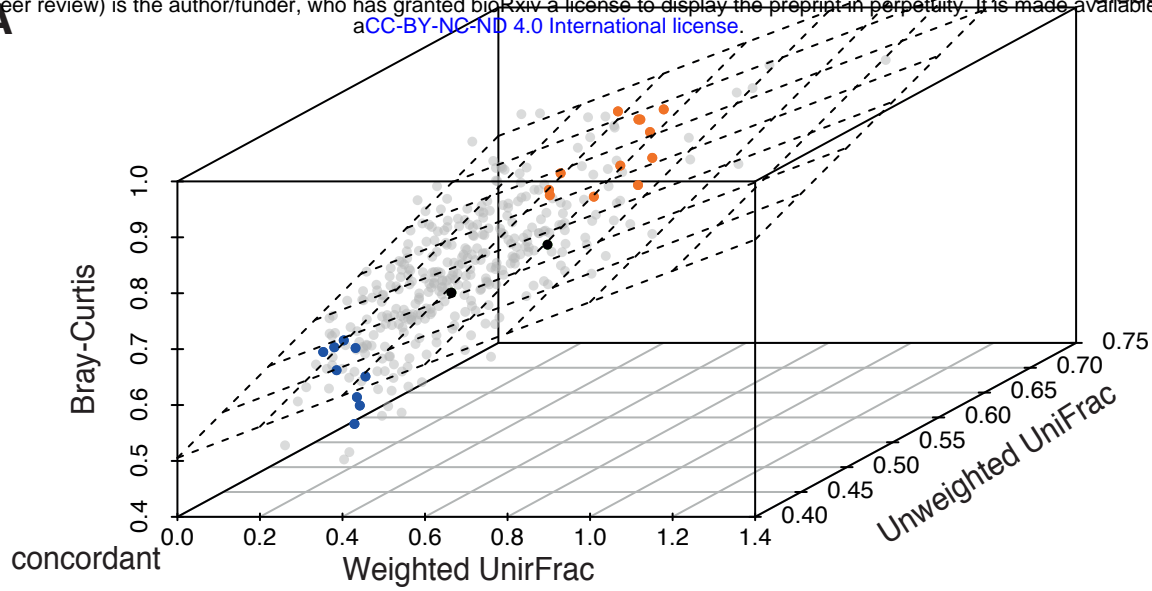

**B**

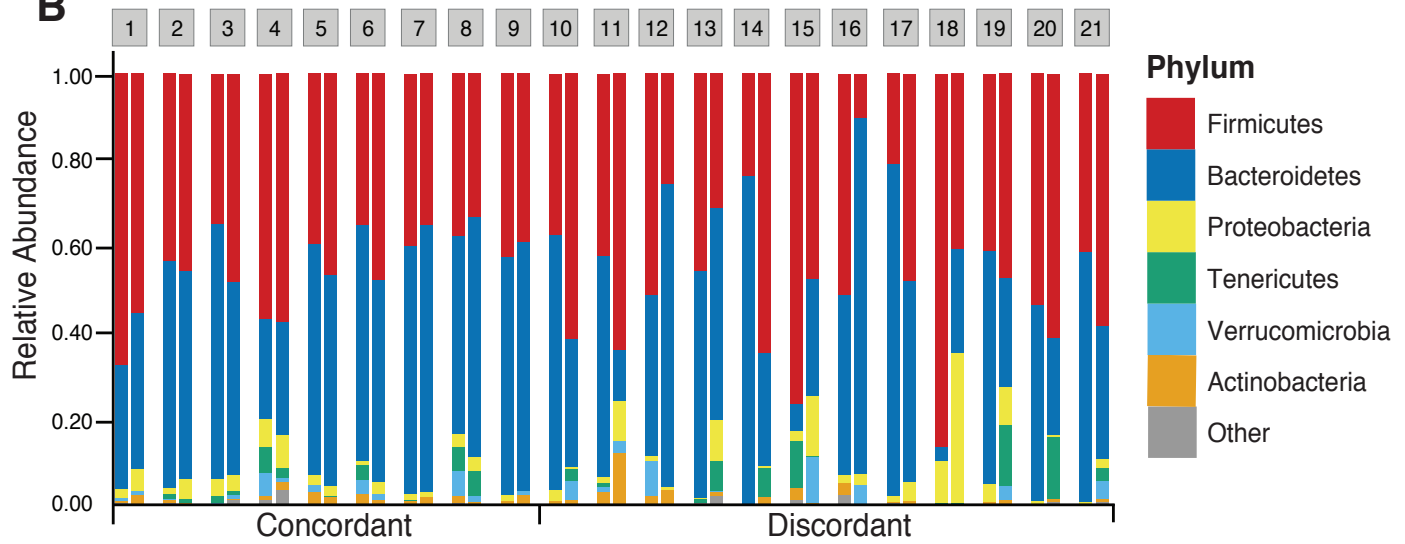

**C**

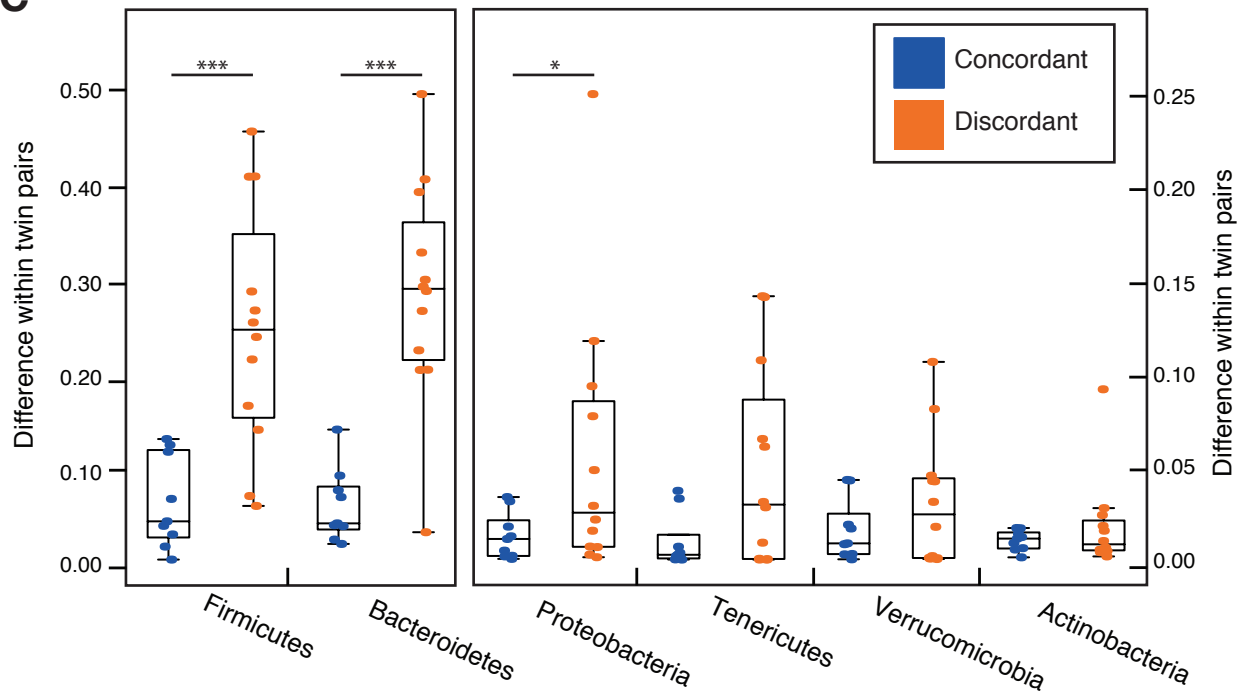

Figure 2.

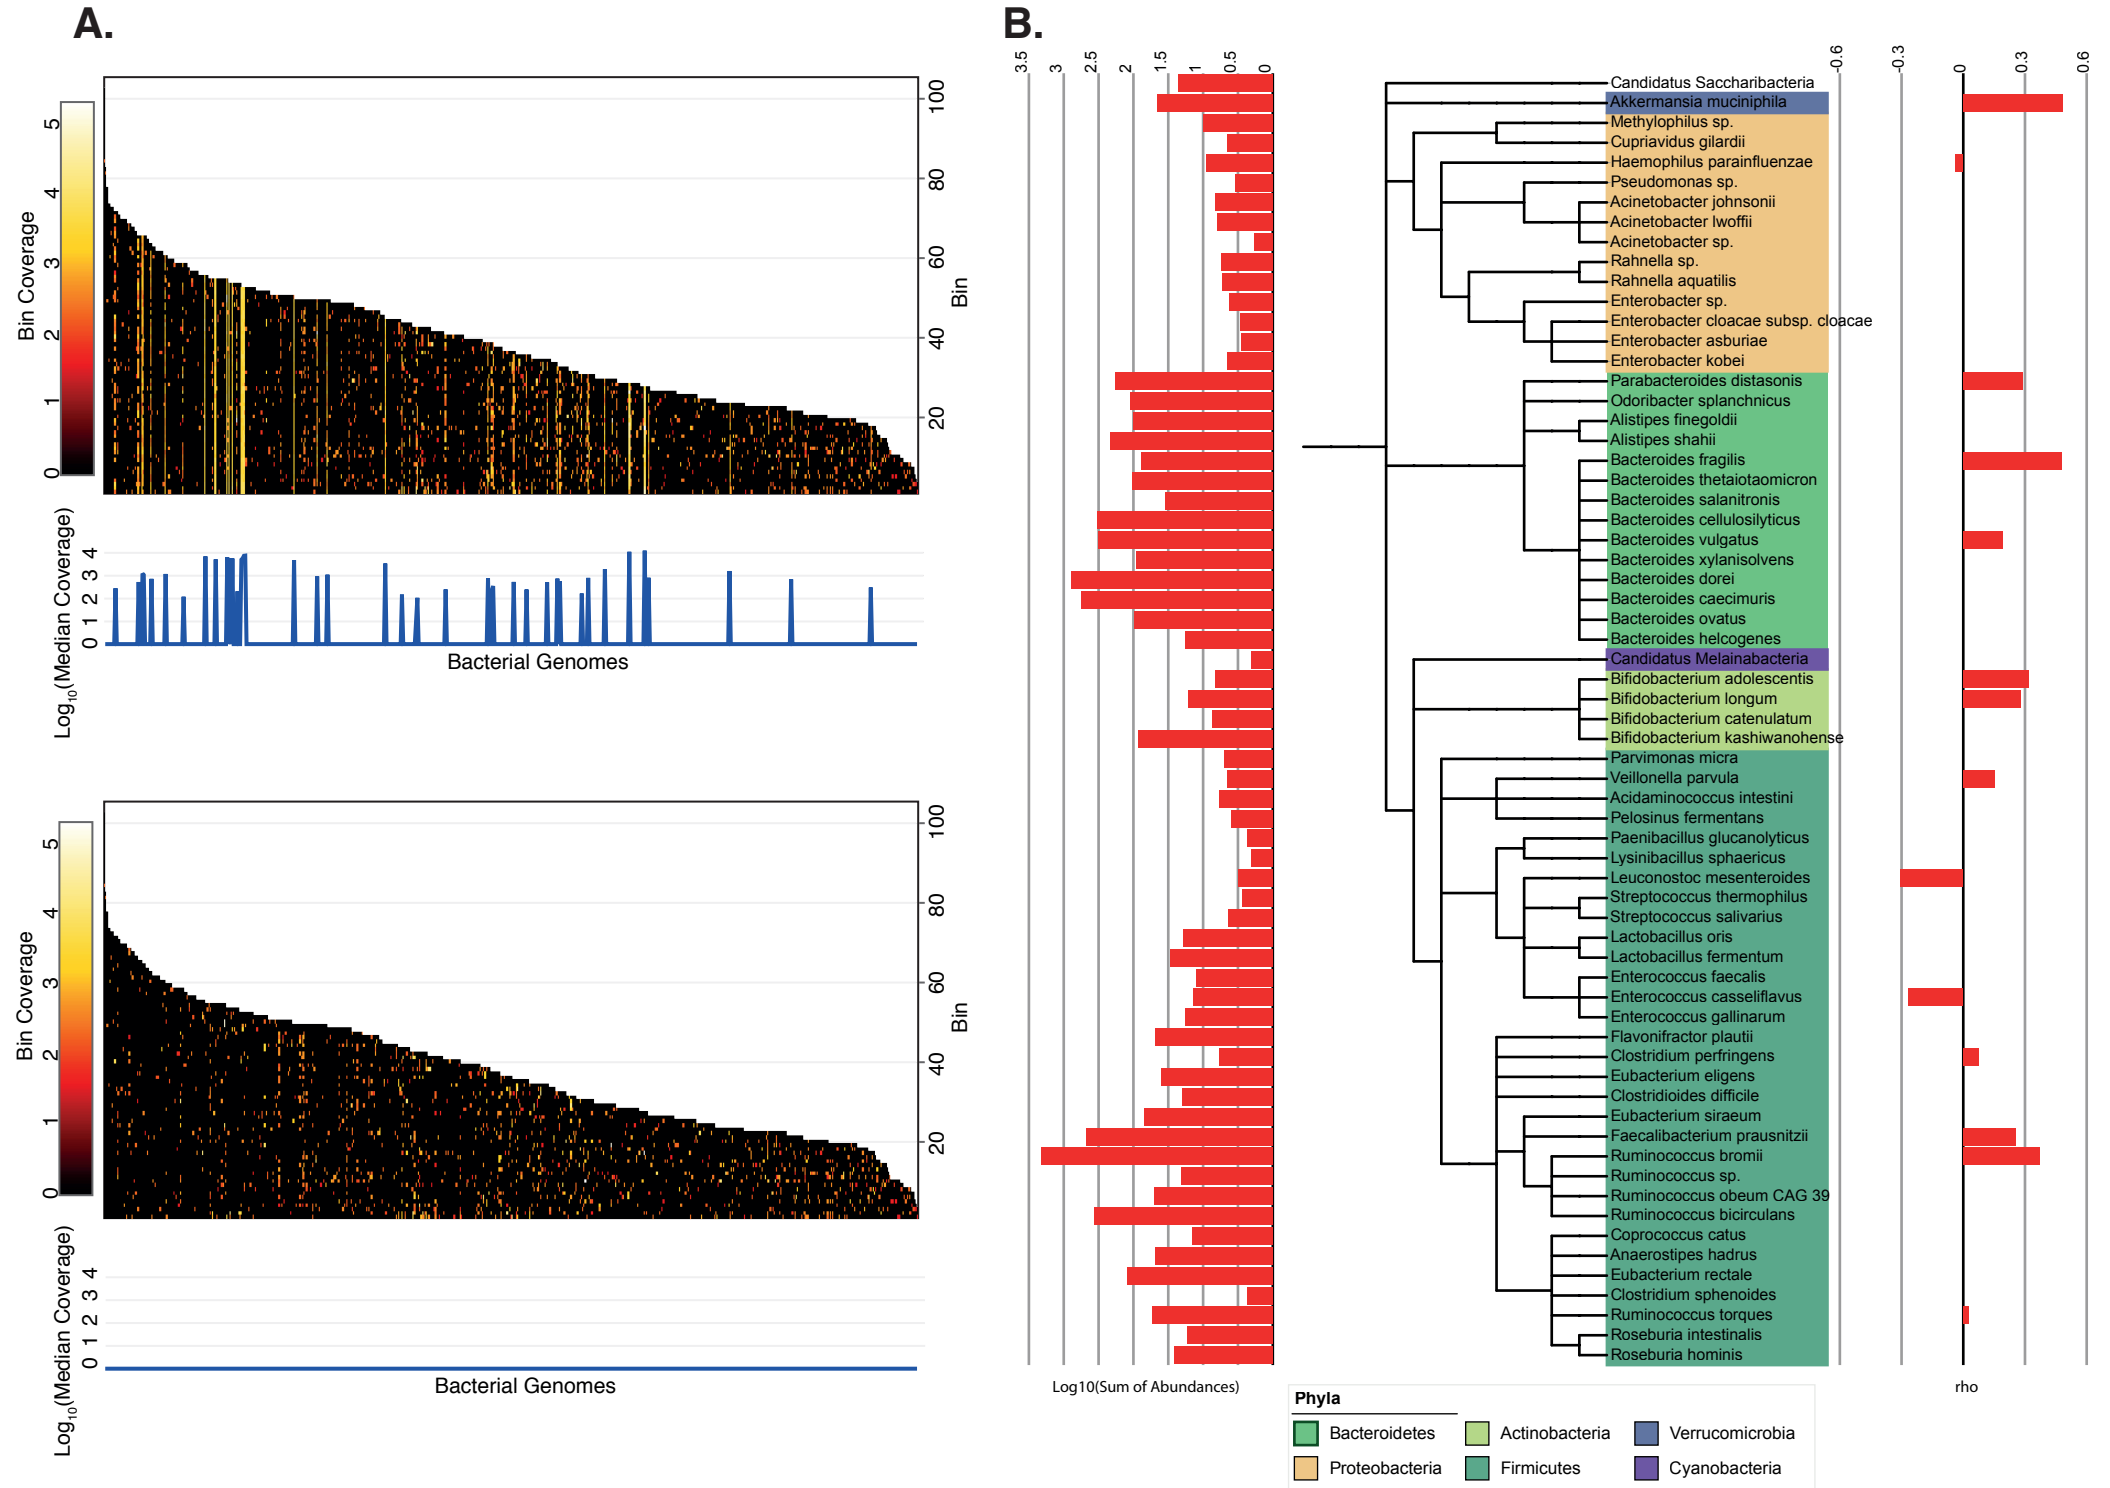

# Figure 3

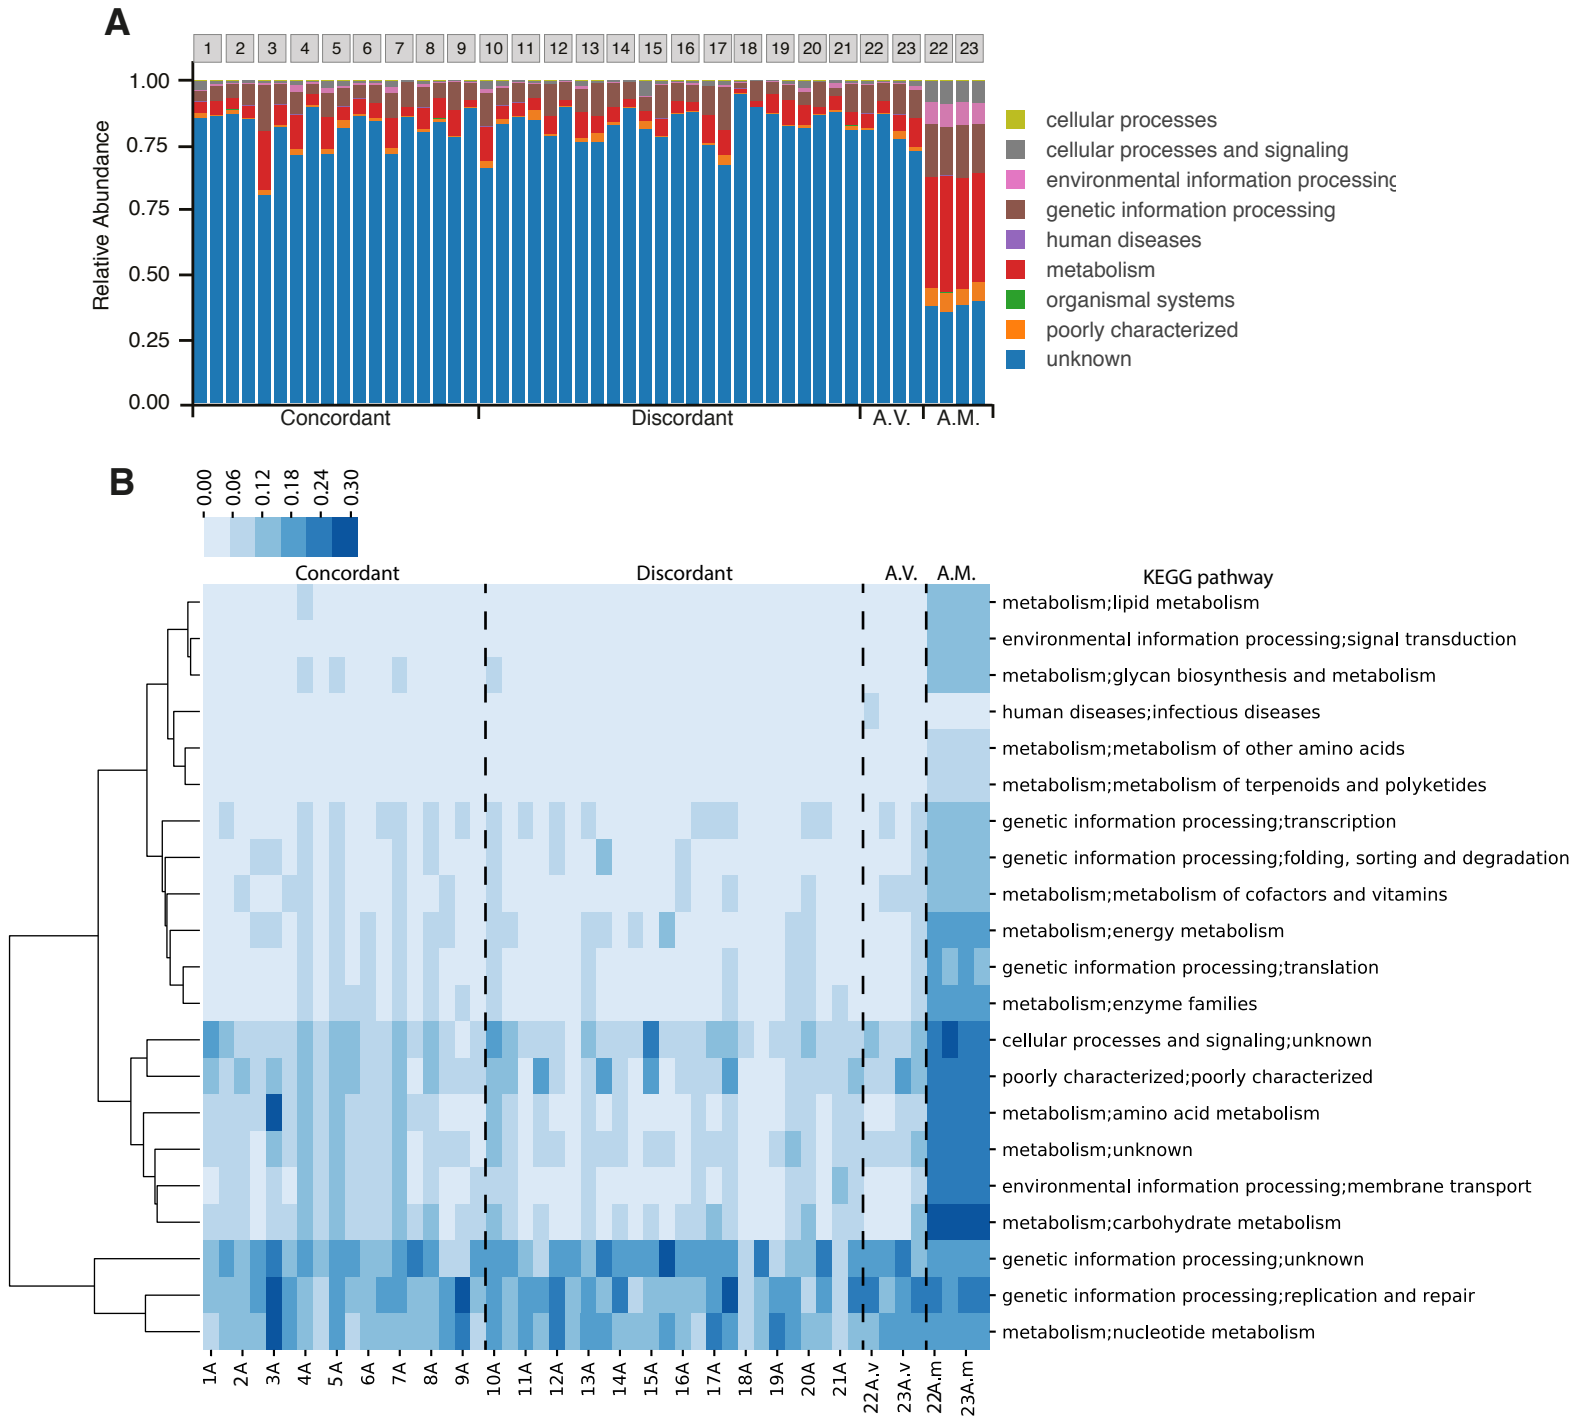



# Figure 4

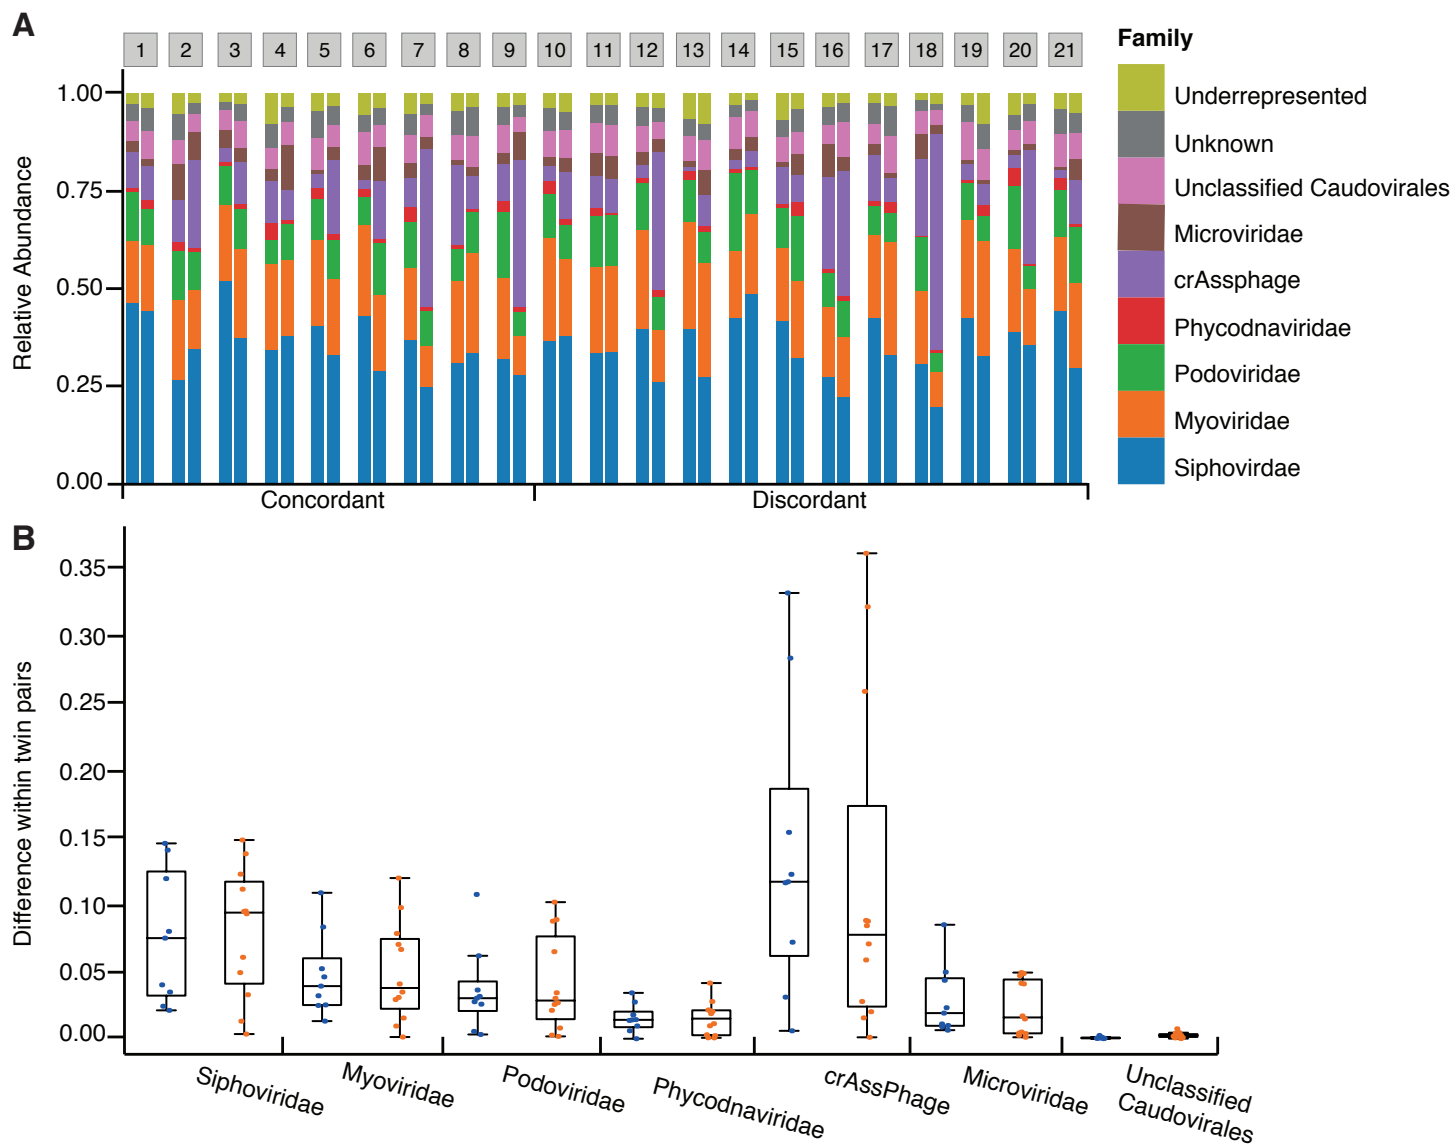

**Figure 5.**

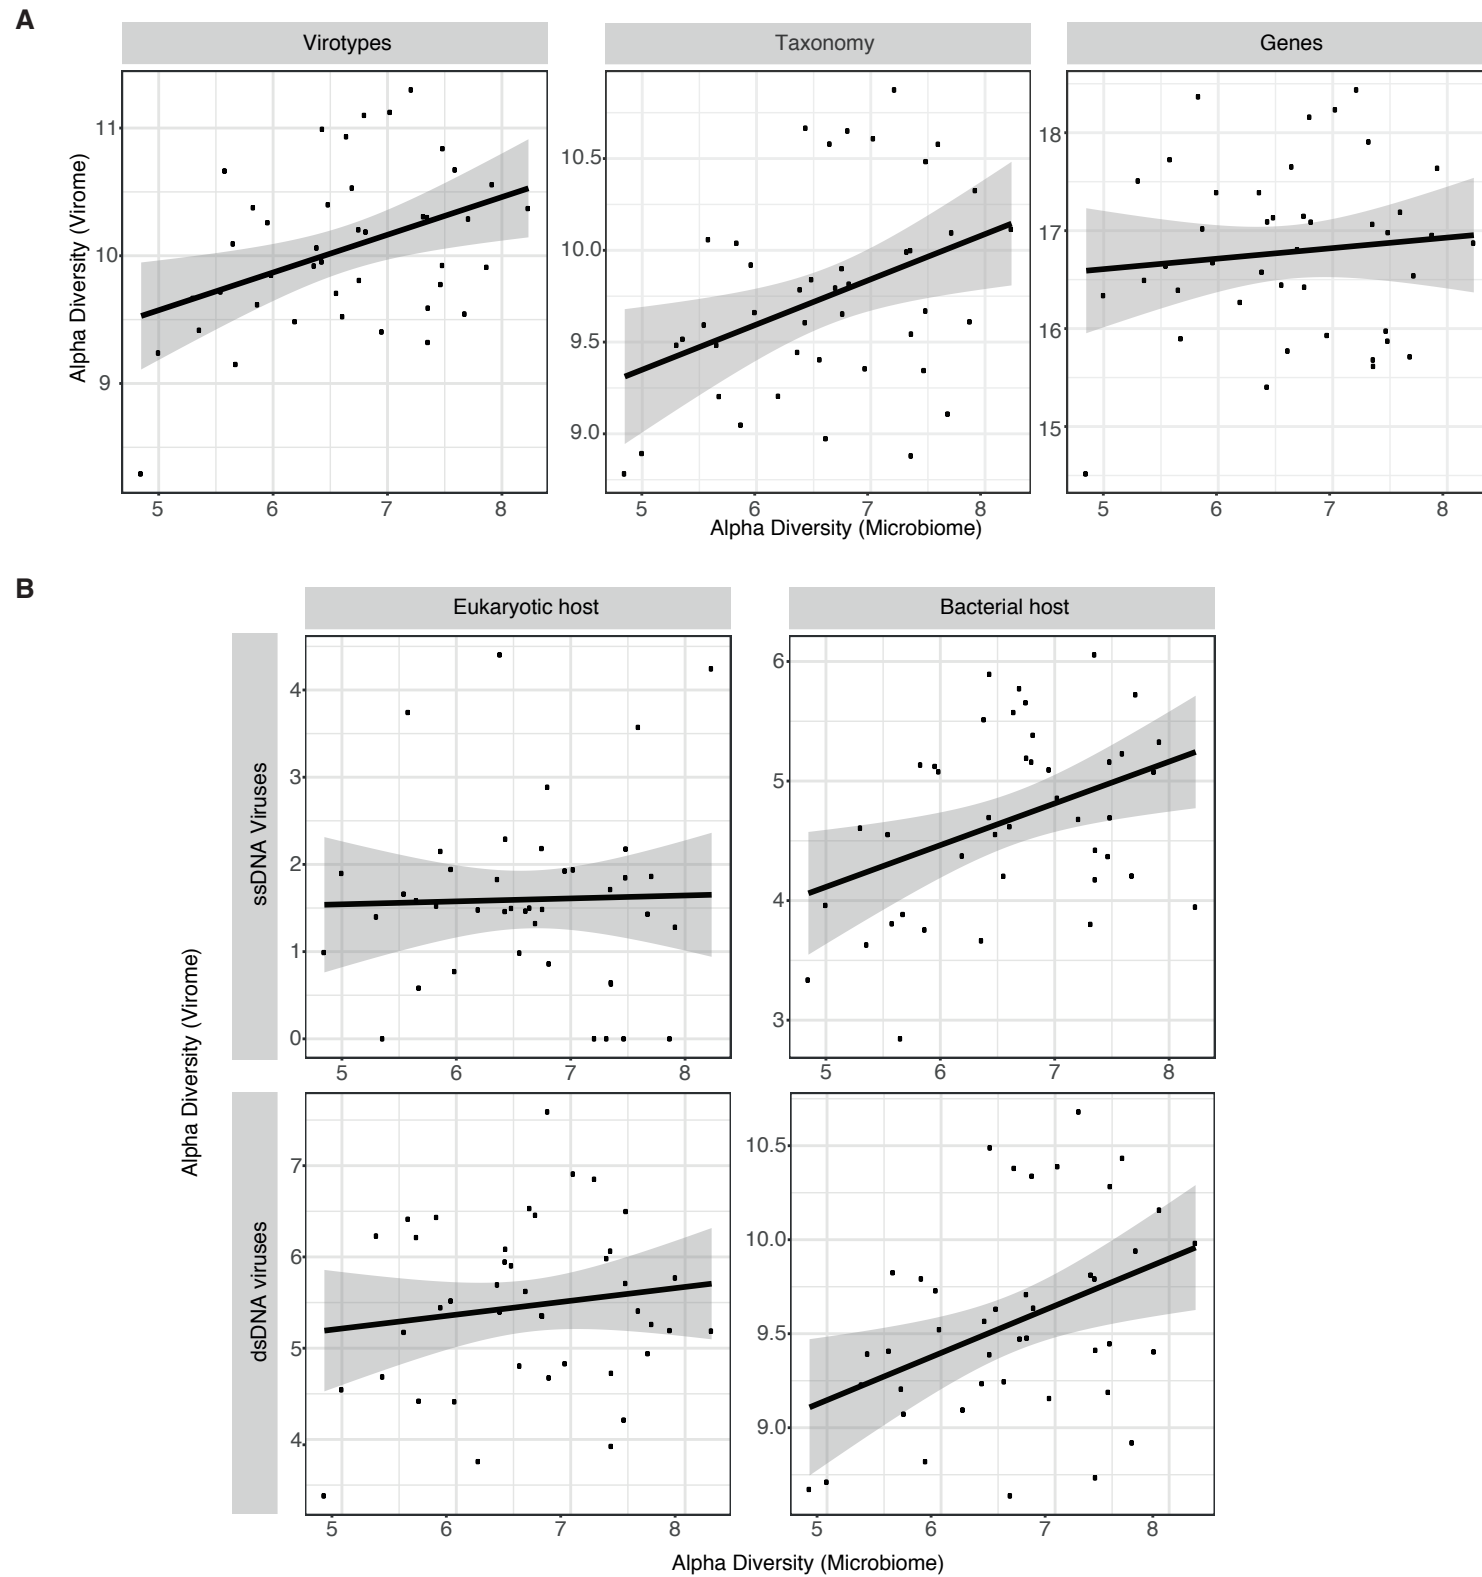

**Figure 6.**

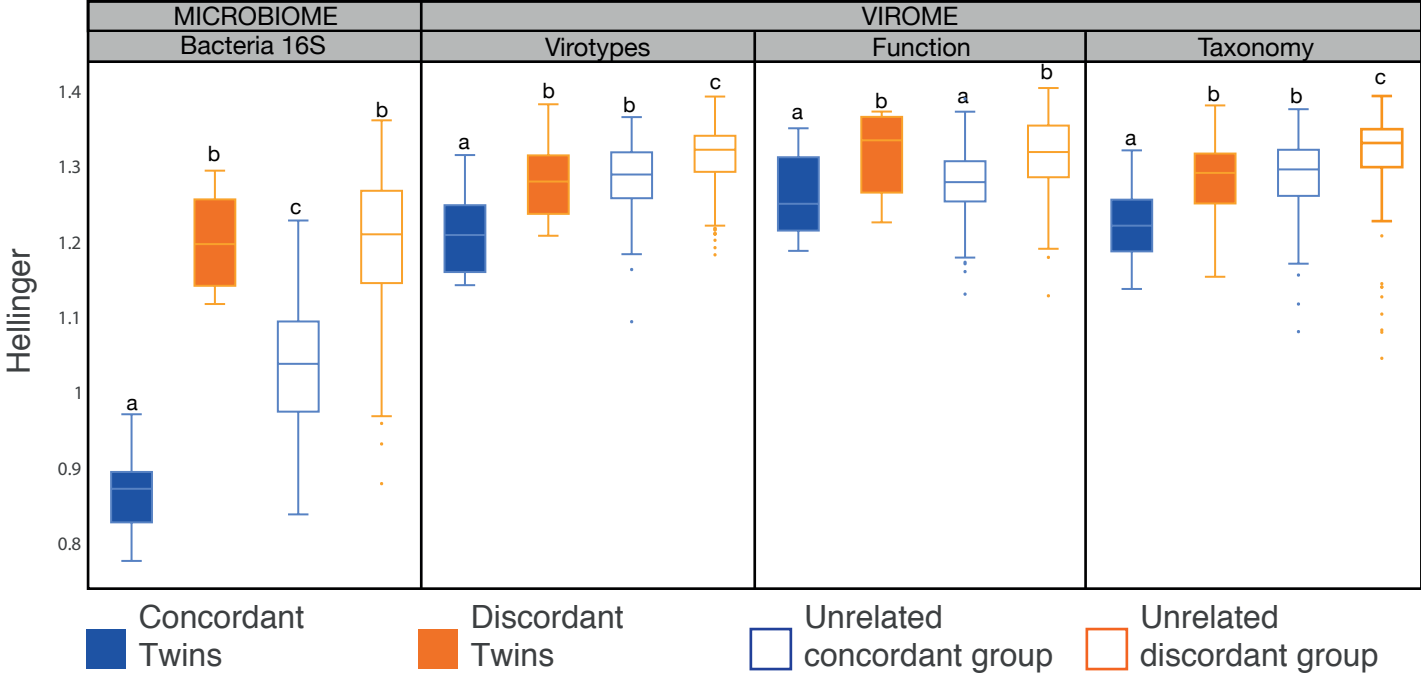

# Figure S1

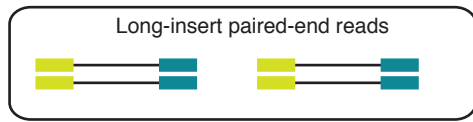

Assembly

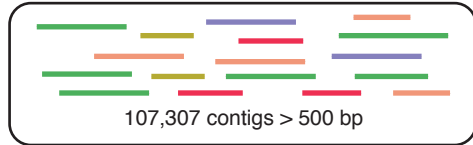

Dereplication

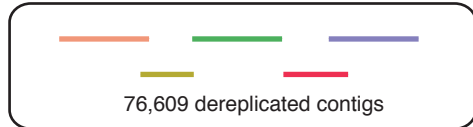

Map clean reads to contigs

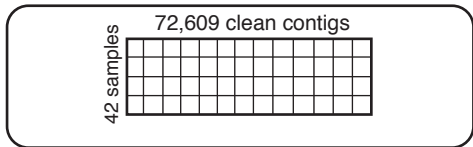

Coverage filter

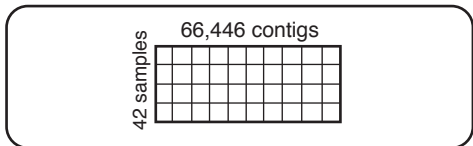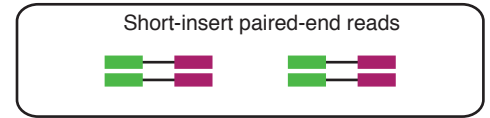

Merge paired-end reads

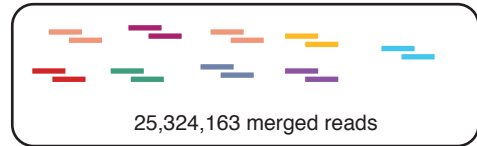

Map to ICG and KEGG annotation

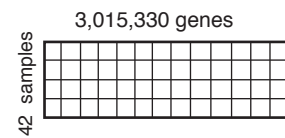

Length filter

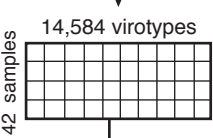

Taxonomic annotation

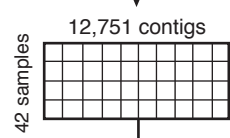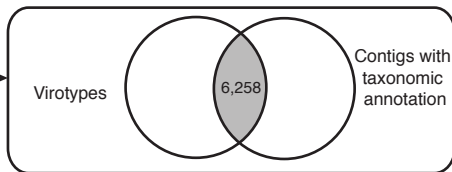

Layer I:  
Virotypes

Layer II:  
Taxonomically  
annotated contigs

Layer III:  
Annotated genes

Figure S2.

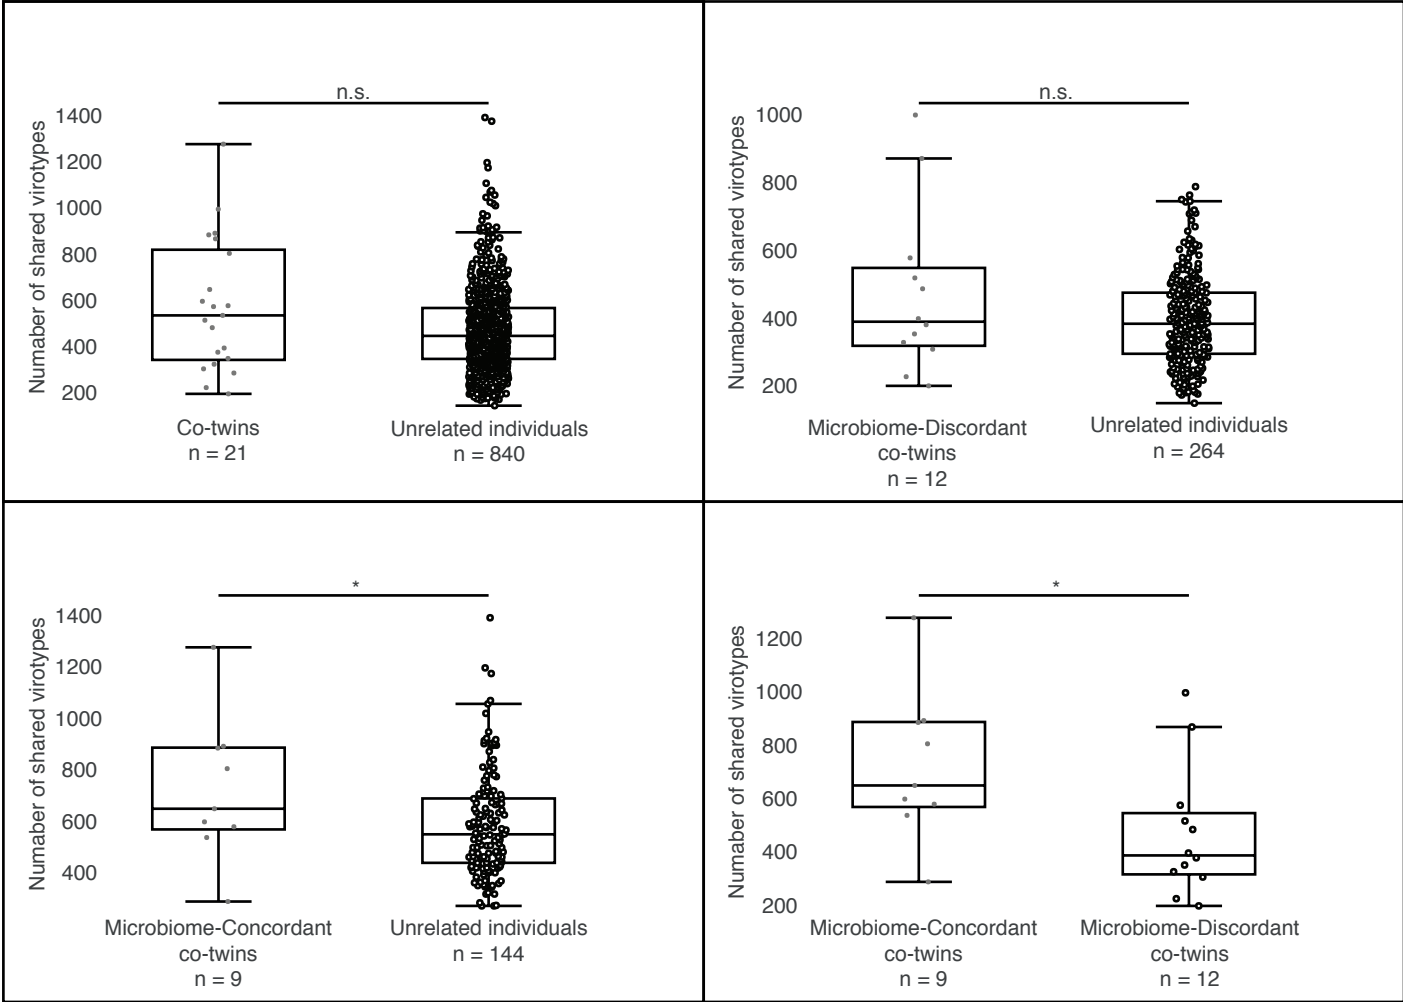

Figure S3.

A

bioRxiv preprint doi: <https://doi.org/10.1101/509273>; this version posted January 2, 2019. The copyright holder for this preprint (which was not certified by peer review) is the author/funder, who has granted bioRxiv a license to display the preprint in perpetuity. It is made available under aCC-BY-NC-ND 4.0 International license.

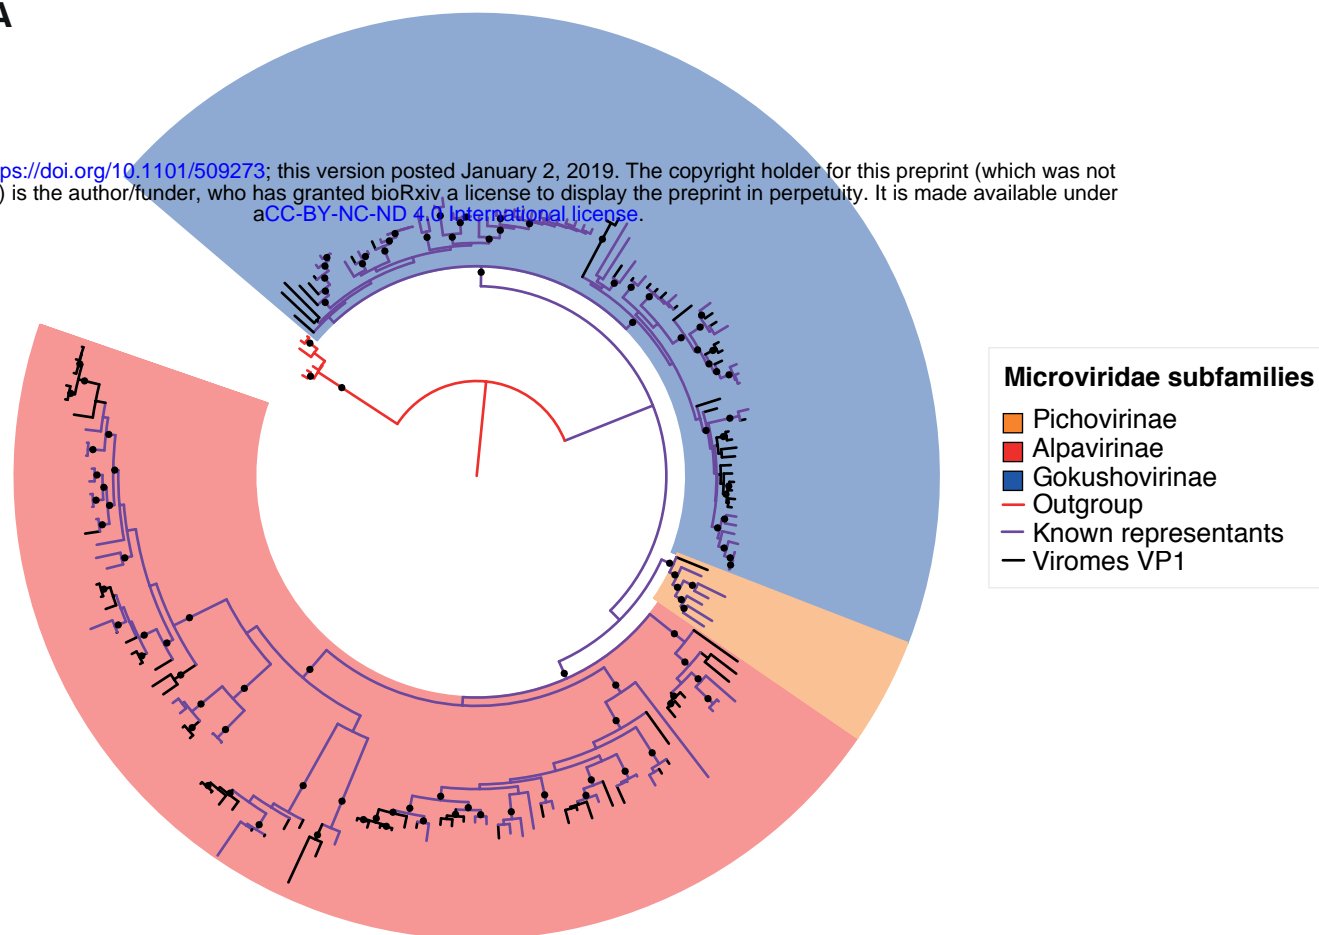

Tree scale: 1

B

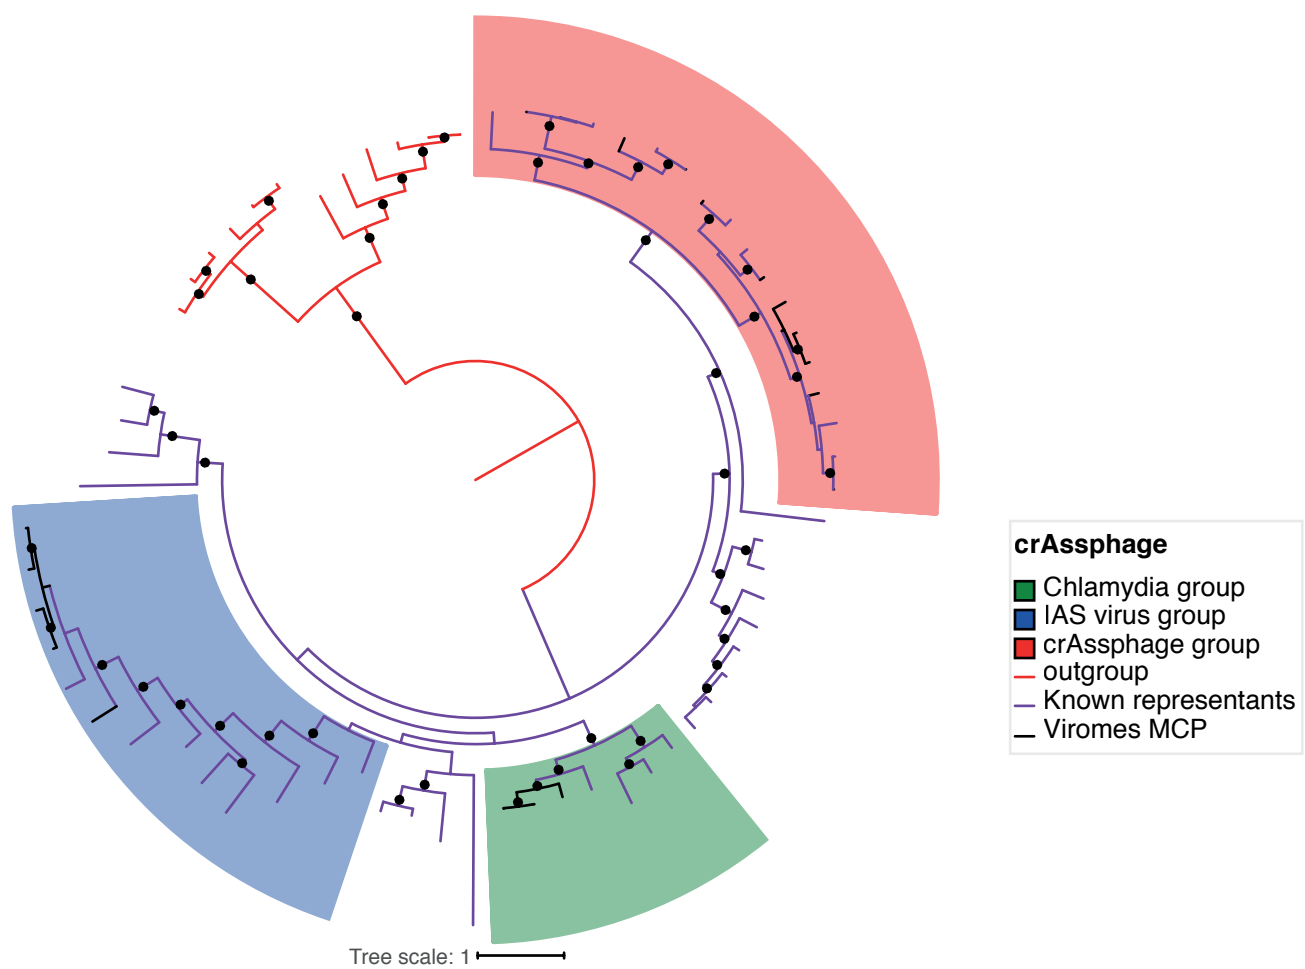

Tree scale: 1



**Figure S5.**

**A**

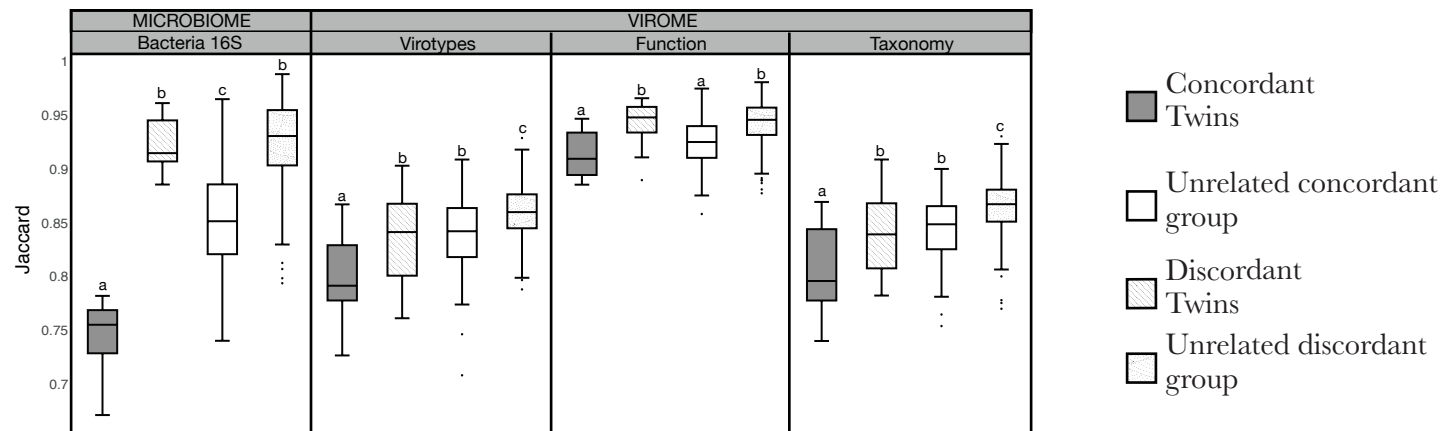

**B**

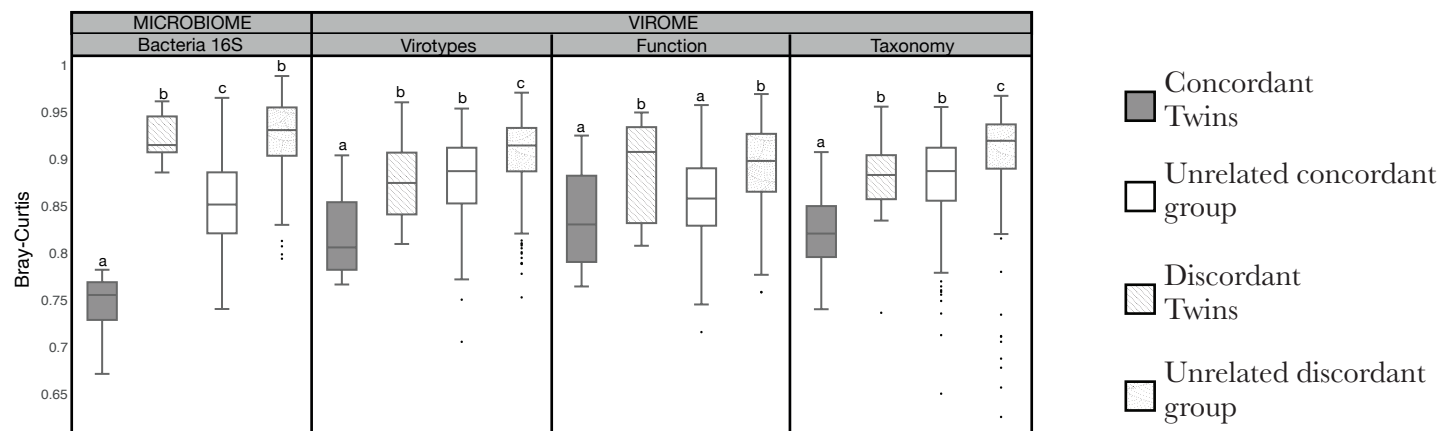

**C**

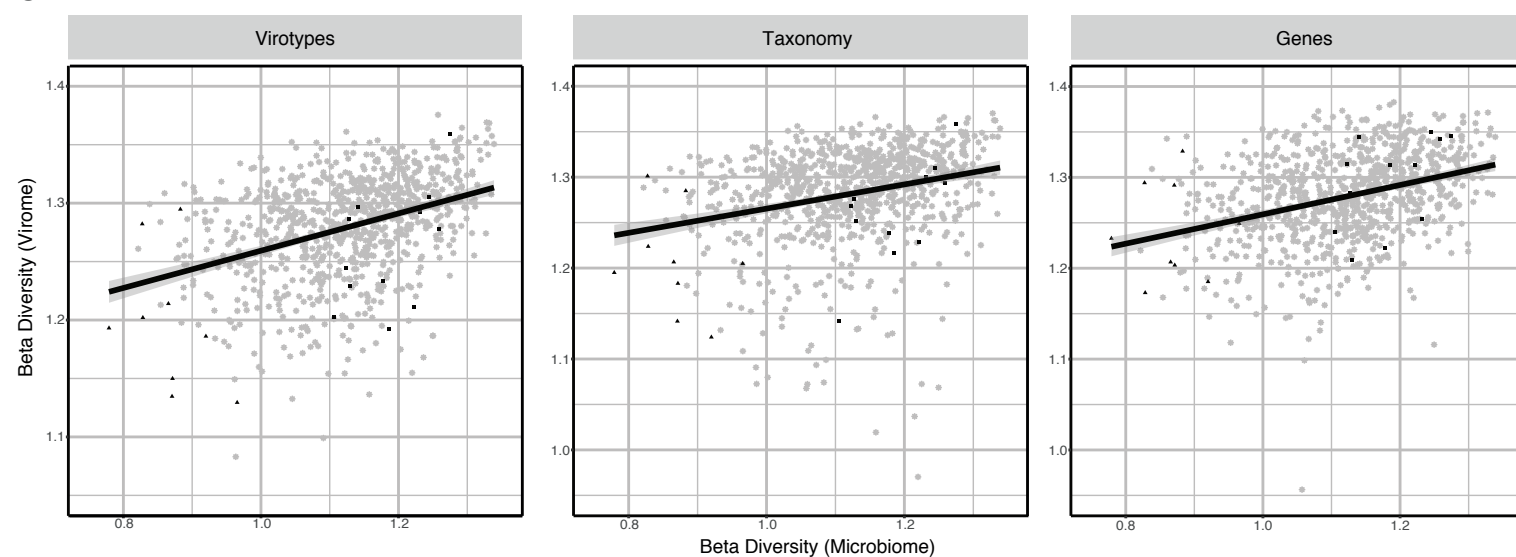

Source: http://biorxiv.org/content/10.1101/509273v1.full.pdf
